# Supplementary material
Source: PubMed Central journal article supplement (PMC4631653)
Supplement: NIHMS701855-supplement-4.pdf [file NIHMS701855-supplement-4.pdf]

**Supplementary Tab. S2. Oligonucleotide Sequence for all the primers used in the study.**

| Name                  | Oligonucleotide sequence (5' - 3')  |                          |
|-----------------------|-------------------------------------|--------------------------|
|                       | Forward                             | Reverse                  |
| <b>hsa-miR-195-5p</b> | CatNo: HmiRQP0283, GeneCopoeia, USA |                          |
| <b>SMAP2</b>          | atgatgcctccaccagtagg                | gggtggtcatcattccattc     |
| <b>DCUN1D1</b>        | tgccactggaaacttagtgct               | ctgcaatcatcgtactgaagtct  |
| <b>SMAD4</b>          | gatacgtggacccttctgga                | tgacccaaacatcaccttca     |
| <b>IPO9</b>           | ttcacagcaagcatggaaag                | gcttcaatctgggacagctc     |
| <b>RPS6KB1</b>        | gctgtggattggtggagttt                | gtgtgaggtagggaggcaaa     |
| <b>CAPZA2</b>         | gaaagccatcagttccaagc                | ttcaagatgccaccacttg      |
| <b>CPNE1</b>          | tatggccctaccaactttgc                | acagcaccatcagtcagcag     |
| <b>GAPDH</b>          | catgggtgtgaacctagagaagta            | cagtagaggcagggatgatgttct |
| <b>U6</b>             | CatNo: HmiRQP9001, GeneCopoeia, USA |                          |

**Supplementary Tab.S3. The antibodies used in this study.**

| Name            | Description       | Product code | Company           |
|-----------------|-------------------|--------------|-------------------|
| anti- RPS6KB1   | rabbit monoclonal | ab32359      | Abcam Co Ltd, USA |
| anti-MMP-9      | rabbit monoclonal | ZA-0562      | ZSGB-BIO, China   |
| anti-VEGF       | rabbit polyclonal | BA0407       | BOSTER, China     |
| anti-BAD        | rabbit polyclonal | BA0530       | BOSTER, China     |
| anti-E-cadherin | rabbit monoclonal | ZA-0565      | ZSGB-BIO, China   |
| anti-CD31       | rabbit monoclonal | ZA-0568      | ZSGB-BIO, China   |
| anti-Vimentin   | rabbit monoclonal | ZA-0511      | ZSGB-BIO, China   |
| anti-GAPDH      | rabbit monoclonal | M30008       | Abmart, China     |

**Supplementary Tab.S4. Associations of miR-195 and RPS6KB1 protein expression with clinicopathological features of prostate cancer (PCa) patients**

| Clinical features               | Taylor dataset |                     |          | Tissue microarray (MGH) |                |               |          |
|---------------------------------|----------------|---------------------|----------|-------------------------|----------------|---------------|----------|
|                                 | N              | hsa-miR-195         | <i>P</i> | N                       | RPS6KB1        |               | <i>P</i> |
|                                 |                | Median (Q1, Q3)     |          |                         | Positive n=174 | Negative n=51 |          |
| <b>Age (years)</b>              |                |                     |          |                         |                |               |          |
| < 66                            | 93             | 11.28 (10.84,11.61) | 0.801    | 225                     | 62.05±6.26     | 61.59±6.06    | 0.64     |
| ≥66                             | 20             | 11.15 (10.73,11.67) |          |                         |                |               |          |
| <b>Preoperation PSA (ng/ml)</b> |                |                     |          |                         |                |               |          |
| ≤4                              | 20             | 11.18 (10.82,11.49) | 0.504    | 32                      | 24 (75)        | 8 (25)        | 0.912    |
| > 4                             | 91             | 11.26 (10.81,11.64) |          | 151                     | 119 (78.8)     | 32 (21.2)     |          |
| <b>Gleason Score</b>            |                |                     |          |                         |                |               |          |
| ≤ 6                             | 32             | 11.29 (11.07,11.53) | 0.001    | 88                      | 64 (72.7)      | 24 (27.3)     | 0.413    |
| 7                               | 55             | 11.35 (11.02,11.74) |          | 103                     | 83 (80.6)      | 20 (19.4)     |          |

|                               |    |                     |        |     |            |           |       |
|-------------------------------|----|---------------------|--------|-----|------------|-----------|-------|
| ≥8                            | 19 | 10.82 (10.11,11.09) |        | 34  | 27 (79.4)  | 7 (20.6)  |       |
| <b>Clinical Stage</b>         |    |                     |        |     |            |           |       |
| <T2A                          | 65 | 11.17 (10.76,11.56) | 0.159  | —   | —          | —         | —     |
| ≥T2A                          | 44 | 11.32 (11.06,11.67) |        |     |            |           |       |
| <b>Pathological Stage</b>     |    |                     |        |     |            |           |       |
| T2A-T2C                       | 71 | 11.30 (10.88,11.61) | 0.194  | 169 | 125 (74)   | 44 (26)   | 0.036 |
| T3A-T4                        | 37 | 11.12 (10.73,11.46) |        | 56  | 49 (87.5)  | 7 (12.5)  |       |
| <b>Surgical margin status</b> |    |                     |        |     |            |           |       |
| Negative                      | —  | —                   | —      | 141 | 102 (72.3) | 35 (27.7) | 0.02  |
| Positive                      |    |                     |        | 84  | 72 (85.7)  | 12 (14.3) |       |
| <b>Metastasis failure</b>     |    |                     |        |     |            |           |       |
| Negative                      | 94 | 11.29 (11.02,11.63) | <0.001 | 206 | 156 (75.7) | 50 (24.3) | 0.058 |
| Positive                      | 19 | 10.71 (9.44,11.08)  |        | 19  | 18 (94.7)  | 1 (5.3)   |       |
| <b>Biochemical recurrence</b> |    |                     |        |     |            |           |       |
| Negative                      | 80 | 11.33 (11.05,11.70) | <0.001 | 140 | 101 (72.1) | 39 (27.9) | 0.017 |
| Positive                      | 27 | 10.95 (10.26,11.26) |        | 85  | 73 (85.9)  | 12 (14.1) |       |

**Overall survival**

|       |    |                     |       |     |            |           |      |
|-------|----|---------------------|-------|-----|------------|-----------|------|
| Alive | 99 | 11.24 (10.87,11.62) | 0.252 | 182 | 135 (74.2) | 47 (25.8) | 0.02 |
| Died  | 14 | 10.82 (9.40,11.58)  |       | 43  | 39 (90.7)  | 4 (9.3)   |      |

---

Note: “-“ means there are lack of relative information of patients in our cohort.



**Supplementary Tab.S5. Prognostic value of miR-195 expression for the biochemical recurrence-free survival in univariate and multivariate analysis by Cox Regression**

|                          | <b>Univaviable analysis</b> |                 | <b>Multivaviable analysis</b> |                 |
|--------------------------|-----------------------------|-----------------|-------------------------------|-----------------|
|                          | <b>HR (95% CI)</b>          | <b><i>P</i></b> | <b>HR (95% CI)</b>            | <b><i>P</i></b> |
| Age                      | 1.04 (0.98-1.09)            | 0.186           | 0.73 (0.28-2.07)              | 0.593           |
| Clinical tumor stage     | 0.83 (0.39-1.89)            | 0.692           | 0.67 (0.27-1.63)              | 0.665           |
| Pathological tumor stage | 5.32 (2.36-11.99)           | <0.001          | 2.79 (0.98-7.92)              | 0.054           |
| Preoperative PSA         | 1.37 (0.56-4.79)            | 0.366           | 1.17 (0.32-4.26)              | 0.81            |
| Gleason score            | 8.11 (3.98-16.52)           | <0.001          | 6.24(2.82-13.80)              | <0.001          |
| miR-195                  | 0.53 (0.40-0.71)            | <0.001          | 0.61 (0.41-0.93)              | 0.022           |

HR, Hazard ratio; CI, confidence interval; Age, between age  $\leq 66$  and age  $> 66$ ; Clinical tumor stage, between  $< T2A$  and  $\geq T2A$ ; Pathological tumor stage, between  $T2A-T2C$  and  $T3A-T4$ ; Preoperative PSA (ng/ml), between  $\leq 4$  and  $> 4$ ; Gleason score, among Gleason score  $\leq 6, 7$  and  $\geq 8$ ; miR-195, continuous miR-195 expression levels.

**Supplementary Tab. S6 Differentially expressed proteins detected by iTRAQ**

| <b>Uniprot_accession/ID</b> | <b>Official Symbol</b> | <b>Ratio</b> | <b>P_value</b> |
|-----------------------------|------------------------|--------------|----------------|
| sp P05091 ALDH2_HUMAN       | ALDH2                  | 4.195667267  | 0.03428        |
| sp P13861 KAP2_HUMAN        | PRKAR2A                | 3.42925328   | 0.04925        |
| sp Q16836 HCDH_HUMAN        | HADH                   | 3.355118454  | 0.02164        |
| sp P35232 PHB_HUMAN         | PHB                    | 3.224297464  | 0.00235        |
| sp P38646 GRP75_HUMAN       | HSPA9                  | 2.752338052  | 0.0222         |
| sp Q9Y697 NFS1_HUMAN        | NFS1                   | 2.632053494  | 0.01185        |
| sp Q9H3P2 NELFA_HUMAN       | NELFA                  | 2.479489744  | 0.02854        |
| sp Q6XZF7 DNMBP_HUMAN       | DNMBP                  | 2.425709888  | 0.01218        |
| sp Q9BX68 HINT2_HUMAN       | HINT2                  | 2.279932439  | 0.04065        |
| sp Q9NSE4 SYIM_HUMAN        | IARS2                  | 2.250578523  | 0.03209        |
| sp Q6NVY1 HIBCH_HUMAN       | HIBCH                  | 2.119951993  | 0.03158        |
| sp P23381 SYWC_HUMAN        | WARS                   | 2.11467427   | 0.04801        |
| sp P04844 RPN2_HUMAN        | RPN2                   | 2.079105943  | 0.04058        |
| sp P54886 P5CS_HUMAN        | ALDH18A1               | 2.069828957  | 0.04518        |
| sp O43815 STRN_HUMAN        | STRN                   | 1.975410998  | 0.01713        |
| sp Q15717 ELAV1_HUMAN       | ELAVL1                 | 1.974220246  | 0.04615        |
| sp Q8NB5 GT251_HUMAN        | COLGALT1               | 1.915514767  | 0.03446        |
| sp P50213 IDH3A_HUMAN       | IDH3A                  | 1.906443238  | 0.01252        |
| sp O60832 DKC1_HUMAN        | DKC1                   | 1.902412027  | 0.02959        |
| sp O00148 DX39A_HUMAN       | DDX39A                 | 1.840716213  | 0.00951        |
| sp P31040 DHSA_HUMAN        | SDHA                   | 1.82615447   | 0.01935        |
| sp P51572 BAP31_HUMAN       | BCAP31                 | 1.770583719  | 0.04167        |
| sp P29083 T2EA_HUMAN        | GTF2E1                 | 1.729170263  | 0.03563        |
| sp Q9UI12 VATH_HUMAN        | ATP6V1H                | 1.727126241  | 0.00458        |
| sp P12268 IMDH2_HUMAN       | IMPDH2                 | 1.622033745  | 0.01718        |
| sp P23919 KTHY_HUMAN        | DTYMK                  | 1.534812003  | 0.02571        |
| sp Q9NX18 SDHF2_HUMAN       | SDHAF2                 | 1.522305518  | 0.02044        |
| sp O75367 H2AY_HUMAN        | H2AFY                  | 1.508617014  | 0.04558        |
| sp Q96PZ0 PUS7_HUMAN        | PUS7                   | 0.739721179  | 0.00255        |
| sp O95302 FKBP9_HUMAN       | FKBP9                  | 0.736306727  | 0.03217        |
| sp Q9UP95 S12A4_HUMAN       | SLC12A4                | 0.722360298  | 0.04439        |
| sp O75909 CCNK_HUMAN        | CCNK                   | 0.721757635  | 0.02487        |
| sp Q9NZL4 HPBP1_HUMAN       | HSPBP1                 | 0.721199125  | 0.04093        |
| sp O43809 CPSF5_HUMAN       | NUDT21                 | 0.717672423  | 0.04304        |
| sp Q93009 UBP7_HUMAN        | USP7                   | 0.705983415  | 0.03583        |
| sp Q8WU79 SMAP2_HUMAN       | SMAP2                  | 0.698306456  | 0.01474        |
| sp P62841 RS15_HUMAN        | RPS15                  | 0.695385486  | 0.04636        |
| sp Q9BSJ8 ESYT1_HUMAN       | ESYT1                  | 0.680789188  | 0.0129         |
| sp Q96GG9 DCNL1_HUMAN       | DCUN1D1                | 0.671341419  | 0.03208        |
| sp Q13045 FLII_HUMAN        | FLII                   | 0.647168115  | 0.03531        |
| sp P30530 UFO_HUMAN         | AXL                    | 0.645879164  | 0.0056         |
| sp Q13485 SMAD4_HUMAN       | SMAD4                  | 0.640501678  | 0.01217        |
| sp P00390 GSHR_HUMAN        | GSR                    | 0.635484383  | 0.00961        |
| sp Q14558 KPRA_HUMAN        | PRPSAP1                | 0.630326912  | 0.01955        |
| sp Q13033 STRN3_HUMAN       | STRN3                  | 0.590797544  | 0.02777        |
| sp O00303 EIF3F_HUMAN       | EIF3F                  | 0.589347705  | 0.00831        |
| sp Q96P70 IPO9_HUMAN        | IPO9                   | 0.587161526  | 0.02756        |
| sp P23443 KS6B1_HUMAN       | RPS6KB1                | 0.583525553  | 0.00346        |
| sp Q86W92 LIPB1_HUMAN       | PPFIBP1                | 0.580734506  | 0.01276        |

|                       |          |             |         |
|-----------------------|----------|-------------|---------|
| sp Q01433 AMPD2_HUMAN | AMPD2    | 0.579529971 | 0.02144 |
| sp P47755 CAZA2_HUMAN | CAPZA2   | 0.576990873 | 0.03222 |
| sp P55145 MANF_HUMAN  | MANF     | 0.573241577 | 0.00051 |
| sp Q9NZM1 MYOF_HUMAN  | MYOF     | 0.572868854 | 0.01999 |
| sp Q15052 ARHG6_HUMAN | ARHGEF6  | 0.5594327   | 0.03733 |
| sp Q9H4A6 GOLP3_HUMAN | GOLPH3   | 0.556864768 | 0.01408 |
| sp Q4G0F5 VP26B_HUMAN | VPS26B   | 0.547502913 | 0.04771 |
| sp O95819 M4K4_HUMAN  | MAP4K4   | 0.540254667 | 0.01086 |
| sp Q99829 CPNE1_HUMAN | CPNE1    | 0.526200175 | 0.02093 |
| sp P52306 GDS1_HUMAN  | RAP1GDS1 | 0.504384212 | 0.02283 |
| sp Q9UQB8 BAIP2_HUMAN | BAIAP2   | 0.486005686 | 0.04721 |
| sp Q8IXI2 MIRO1_HUMAN | RHOT1    | 0.477038652 | 0.03104 |
| sp Q9H0C5 BTBD1_HUMAN | BTBD1    | 0.476638153 | 0.01737 |
| sp Q02218 ODO1_HUMAN  | OGDH     | 0.427827843 | 0.01335 |
| sp Q9UMX0 UBQL1_HUMAN | UBQLN1   | 0.402540468 | 0.04082 |
| sp Q5EBL4 RIPL1_HUMAN | RILPL1   | 0.402213    | 0.01472 |
| sp Q9Y371 SHLB1_HUMAN | SH3GLB1  | 0.395100318 | 0.04244 |
| sp P21980 TGM2_HUMAN  | TGM2     | 0.391278729 | 0.00883 |
| sp P54687 BCAT1_HUMAN | BCAT1    | 0.380259246 | 0.01514 |
| sp P09601 HMOX1_HUMAN | HMOX1    | 0.376833893 | 0.04515 |
| sp P48200 IREB2_HUMAN | IREB2    | 0.359795123 | 0.04353 |
| sp O14737 PDCD5_HUMAN | PDCD5    | 0.359399945 | 0.01548 |
| sp P37173 TGFR2_HUMAN | TGFBR2   | 0.327228926 | 0.00972 |
| sp Q9NZN4 EHD2_HUMAN  | EHD2     | 0.316448867 | 0.00021 |
| sp Q32P44 EMAL3_HUMAN | EML3     | 0.308072053 | 0.02469 |
| sp Q6DKJ4 NXN_HUMAN   | NXN      | 0.304598354 | 0.00429 |
| sp Q9UBV8 PEF1_HUMAN  | PEF1     | 0.278009277 | 0.03426 |
| sp P54652 HSP72_HUMAN | HSPA2    | 0.232927844 | 0.00693 |
| sp Q15149 PLEC_HUMAN  | PLEC     | 0.22473355  | 0.01253 |

---

## KEGG pathway analysis using Ingenuity Systems, Inc.© 2000-2013 All rights reserved.

| Ingenuity Canonical Pathways                   | -log(p-value) | Ratio    | Molecules                                 |
|------------------------------------------------|---------------|----------|-------------------------------------------|
| TCA Cycle II (Eukaryotic)                      | 3.94E00       | 7.5E-02  | SDHA, IDH3A, OGDH                         |
| mTOR Signaling                                 | 3.74E00       | 2.82E-02 | HMOX1, RPS6KB1, EIF3F, PLD2, RHOT1, RPS15 |
| Pancreatic Adenocarcinoma Signaling            | 2.92E00       | 3.12E-02 | TGFBR2, HMOX1, PLD2, SMAD4                |
| IL-8 Signaling                                 | 2.88E00       | 2.22E-02 | HMOX1, RPS6KB1, PLD2, RHOT1, MAP4K4       |
| Choline Biosynthesis III                       | 2.85E00       | 9.09E-02 | HMOX1, PLD2                               |
| Valine Degradation I                           | 2.56E00       | 5.71E-02 | HIBCH, BCAT1                              |
| Phospholipase C Signaling                      | 2.45E00       | 1.89E-02 | TGM2, HMOX1, PLD2, RHOT1, ARHGEF6         |
| Alanine Biosynthesis III                       | 2.36E00       | 3.33E-01 | NFS1                                      |
| Glucocorticoid Receptor Signaling              | 2.25E00       | 1.67E-02 | TGFBR2, GTF2E1, HSPA9, SMAD4, HSPA2       |
| Antiproliferative Role of TOB in T Cell Signal | 2.25E00       | 7.69E-02 | TGFBR2, SMAD4                             |
| PPARα/RXRα Activation                          | 2.13E00       | 2E-02    | TGFBR2, PRKAR2A, SMAD4, MAP4K4            |
| Fcy Receptor-mediated Phagocytosis in Mac      | 2.11E00       | 2.83E-02 | HMOX1, RPS6KB1, PLD2                      |
| Antioxidant Action of Vitamin C                | 2.06E00       | 2.7E-02  | HMOX1, PLD2, NXN                          |
| tRNA Charging                                  | 1.93E00       | 2.47E-02 | WARS, IARS2                               |
| Coenzyme A Biosynthesis                        | 1.89E00       | 7.14E-02 | COASY                                     |
| Glutathione Redox Reactions II                 | 1.89E00       | 1.43E-01 | GSR                                       |
| Huntington's Disease Signaling                 | 1.79E00       | 1.59E-02 | SDHA, TGM2, HSPA9, HSPA2                  |
| Role of Oct4 in Mammalian Embryonic Stem       | 1.79E00       | 3.85E-02 | PHB, SH3GLB1                              |
| Molecular Mechanisms of Cancer                 | 1.78E00       | 1.29E-02 | TGFBR2, RHOT1, ARHGEF6, PRKAR2A, SMAD4    |
| Cardiac Hypertrophy Signaling                  | 1.78E00       | 1.6E-02  | TGFBR2, RPS6KB1, RHOT1, PRKAR2A           |
| 2-ketoglutarate Dehydrogenase Complex          | 1.76E00       | 1.11E-01 | OGDH                                      |
| Heme Degradation                               | 1.76E00       | 9.09E-02 | HMOX1                                     |
| Phenylethylamine Degradation I                 | 1.76E00       | 9.09E-02 | ALDH2                                     |
| Proline Biosynthesis I                         | 1.76E00       | 7.14E-02 | ALDH18A1                                  |
| Molybdenum Cofactor Biosynthesis               | 1.76E00       | 6.25E-02 | NFS1                                      |
| eNOS Signaling                                 | 1.71E00       | 1.94E-02 | HSPA9, PRKAR2A, HSPA2                     |
| Insulin Receptor Signaling                     | 1.7E00        | 2.01E-02 | RPS6KB1, PRKAR2A, LIPE                    |
| AMPK Signaling                                 | 1.68E00       | 1.66E-02 | RPS6KB1, PRKAR2A, LIPE                    |
| Colorectal Cancer Metastasis Signaling         | 1.67E00       | 1.49E-02 | TGFBR2, RHOT1, PRKAR2A, SMAD4             |
| Actin Nucleation by ARP-WASP Complex           | 1.61E00       | 2.99E-02 | RHOT1, BAIAP2                             |
| Thioredoxin Pathway                            | 1.59E00       | 1.25E-01 | NXN                                       |
| Phospholipases                                 | 1.58E00       | 2.94E-02 | HMOX1, PLD2                               |
| Regulation of eIF4 and p70S6K Signaling        | 1.57E00       | 1.71E-02 | RPS6KB1, EIF3F, RPS15                     |
| Gαq Signaling                                  | 1.57E00       | 1.75E-02 | HMOX1, PLD2, RHOT1                        |
| Tight Junction Signaling                       | 1.54E00       | 1.8E-02  | TGFBR2, NUDT21, PRKAR2A                   |
| Citrulline Biosynthesis                        | 1.47E00       | 3.85E-02 | ALDH18A1                                  |
| IL-10 Signaling                                | 1.45E00       | 2.56E-02 | HMOX1, MAP4K4                             |
| Mitochondrial Dysfunction                      | 1.45E00       | 1.4E-02  | SDHA, GSR, OGDH                           |
| Leucine Degradation I                          | 1.42E00       | 3.85E-02 | BCAT1                                     |
| BMP signaling pathway                          | 1.36E00       | 2.33E-02 | PRKAR2A, SMAD4                            |
| Regulation of IL-2 Expression in Activated ar  | 1.33E00       | 2.25E-02 | TGFBR2, SMAD4                             |
| Thrombin Signaling                             | 1.3E00        | 1.42E-02 | RPS6KB1, RHOT1, ARHGEF6                   |
| Regulation of Actin-based Motility by Rho      | 1.3E00        | 2.17E-02 | RHOT1, BAIAP2                             |
| Cleavage and Polyadenylation of Pre-mRNA       | 1.29E00       | 7.69E-02 | NUDT21                                    |
| Glutaryl-CoA Degradation                       | 1.29E00       | 4.17E-02 | HADH                                      |
| Purine Nucleotides De Novo Biosynthesis II     | 1.29E00       | 2.38E-02 | IMPDH2                                    |
| Melanocyte Development and Pigmentation        | 1.27E00       | 2.11E-02 | RPS6KB1, PRKAR2A                          |
| TGF-β Signaling                                | 1.26E00       | 2.13E-02 | TGFBR2, SMAD4                             |
| Histamine Degradation                          | 1.26E00       | 3.45E-02 | ALDH2                                     |
| Factors Promoting Cardiogenesis in Vertebr     | 1.24E00       | 2.02E-02 | TGFBR2, SMAD4                             |
| G Beta Gamma Signaling                         | 1.24E00       | 1.65E-02 | ARHGEF6, PRKAR2A                          |
| Superpathway of Citrulline Metabolism          | 1.23E00       | 2.63E-02 | ALDH18A1                                  |
| Urate Biosynthesis/Inosine 5'-phosphate De     | 1.23E00       | 4.35E-02 | IMPDH2                                    |
| Phenylalanine Degradation IV (Mammalian, v     | 1.23E00       | 2.56E-02 | ALDH2                                     |
| Vitamin-C Transport                            | 1.23E00       | 4.55E-02 | NXN                                       |
| Chronic Myeloid Leukemia Signaling             | 1.2E00        | 1.89E-02 | TGFBR2, SMAD4                             |
| Isoleucine Degradation I                       | 1.2E00        | 3.33E-02 | BCAT1                                     |
| IGF-1 Signaling                                | 1.18E00       | 1.87E-02 | RPS6KB1, PRKAR2A                          |
| Fatty Acid α-oxidation                         | 1.17E00       | 4.35E-02 | ALDH2                                     |
| Oxidative Ethanol Degradation III              | 1.17E00       | 2.5E-02  | ALDH2                                     |
| Glutathione Redox Reactions I                  | 1.15E00       | 4.17E-02 | GSR                                       |
| Putrescine Degradation III                     | 1.15E00       | 3.33E-02 | ALDH2                                     |
| Rac Signaling                                  | 1.12E00       | 1.56E-02 | RPS6KB1, BAIAP2                           |
| Tryptophan Degradation X (Mammalian, via       | 1.12E00       | 3.45E-02 | ALDH2                                     |
| Ethanol Degradation IV                         | 1.12E00       | 3.45E-02 | ALDH2                                     |
| Signaling by Rho Family GTPases                | 1.1E00        | 1.14E-02 | RHOT1, ARHGEF6, BAIAP2                    |
| Cardiomyocyte Differentiation via BMP Rece     | 1.1E00        | 4.55E-02 | SMAD4                                     |
| Purine Nucleotides Degradation II (Aerobic)    | 1.08E00       | 2.7E-02  | IMPDH2                                    |
| Protein Kinase A Signaling                     | 1.07E00       | 9.78E-03 | TGFBR2, PRKAR2A, LIPE, SMAD4              |
| Androgen Signaling                             | 1.07E00       | 1.38E-02 | GTF2E1, PRKAR2A                           |
| Tryptophan Degradation III (Eukaryotic)        | 1.06E00       | 2.08E-02 | HADH                                      |
| PTEN Signaling                                 | 1.04E00       | 1.45E-02 | TGFBR2, RPS6KB1                           |
| p38 MAPK Signaling                             | 1.03E00       | 1.67E-02 | TGFBR2, RPS6KB1                           |
| p70S6K Signaling                               | 1.02E00       | 1.52E-02 | RPS6KB1, BCAP31                           |
| Dopamine Degradation                           | 1E00          | 2.63E-02 | ALDH2                                     |
| Pyrimidine Deoxyribonucleotides De Novo Bi     | 1E00          | 2.27E-02 | DTYMK                                     |
| Protein Ubiquitination Pathway                 | 1E00          | 1.11E-02 | USP7, HSPA9, HSPA2                        |
| Estrogen Receptor Signaling                    | 9.77E-01      | 1.47E-02 | THRAP3, GTF2E1                            |
| Triacylglycerol Degradation                    | 9.7E-01       | 3.03E-02 | LIPE                                      |
| Ovarian Cancer Signaling                       | 9.44E-01      | 1.32E-02 | RPS6KB1, PRKAR2A                          |
| Human Embryonic Stem Cell Pluripotency         | 9.33E-01      | 1.23E-02 | TGFBR2, SMAD4                             |
| Hepatic Fibrosis / Hepatic Stellate Cell Acti  | 9.12E-01      | 1.29E-02 | TGFBR2, SMAD4                             |
| Fatty Acid β-oxidation I                       | 9.12E-01      | 2.22E-02 | HADH                                      |
| Hedgehog Signaling                             | 9.12E-01      | 2.86E-02 | PRKAR2A, DCUN1D1                          |
| Aryl Hydrocarbon Receptor Signaling            | 9.07E-01      | 1.17E-02 | TGM2, ALDH18A1                            |
| Epithelial Adherens Junction Signaling         | 8.77E-01      | 1.3E-02  | TGFBR2, BAIAP2                            |
| Ethanol Degradation II                         | 8.73E-01      | 2.33E-02 | ALDH2                                     |
| Glioblastoma Multiforme Signaling              | 8.73E-01      | 1.19E-02 | RPS6KB1, RHOT1                            |
| Inhibition of Angiogenesis by TSP1             | 8.61E-01      | 2.38E-02 | TGFBR2                                    |
| Retinol Biosynthesis                           | 8.49E-01      | 2.22E-02 | LIPE                                      |
| Aldosterone Signaling in Epithelial Cells      | 8.45E-01      | 1.18E-02 | HSPA9, HSPA2                              |
| Noradrenaline and Adrenaline Degradation       | 8.38E-01      | 1.89E-02 | ALDH2                                     |
| Germ Cell-Sertoli Cell Junction Signaling      | 8.31E-01      | 1.18E-02 | TGFBR2, RHOT1                             |
| Cdc42 Signaling                                | 8.1E-01       | 1.08E-02 | ARHGEF6, BAIAP2                           |
| Netrin Signaling                               | 8.06E-01      | 1.72E-02 | PRKAR2A                                   |
| Mechanisms of Viral Exit from Host Cells       | 7.96E-01      | 2.22E-02 | SH3GLB1                                   |
| Neuroprotective Role of THOP1 in Alzheimer     | 7.96E-01      | 1.82E-02 | PRKAR2A                                   |
| Endothelin-1 Signaling                         | 7.65E-01      | 1.04E-02 | HMOX1, PLD2                               |
| NF-κB Signaling                                | 7.61E-01      | 1.1E-02  | TGFBR2, MAP4K4                            |
| RhoGDI Signaling                               | 7.57E-01      | 9.9E-03  | RHOT1, ARHGEF6                            |
| RAR Activation                                 | 7.46E-01      | 1.03E-02 | PRKAR2A, SMAD4                            |
| NRF2-mediated Oxidative Stress Response        | 7.35E-01      | 1.03E-02 | GSR, HMOX1                                |
| GABA Receptor Signaling                        | 7.32E-01      | 1.79E-02 | UBQLN1                                    |
| Regulation of the Epithelial-Mesenchymal Tr    | 7.31E-01      | 1.02E-02 | TGFBR2, SMAD4                             |
| Role of NFAT in Cardiac Hypertrophy            | 7.27E-01      | 9.57E-03 | TGFBR2, PRKAR2A                           |
| EIF2 Signaling                                 | 7.2E-01       | 9.95E-03 | EIF3F, RPS15                              |
| ILK Signaling                                  | 7.09E-01      | 9.76E-03 | RHOT1, ARHGEF6                            |
| Assembly of RNA Polymerase II Complex          | 7.08E-01      | 1.79E-02 | GTF2E1                                    |
| Heparan Sulfate Biosynthesis (Late Stages)     | 7.08E-01      | 1.61E-02 | LIPE                                      |
| Amyloid Processing                             | 7E-01         | 1.64E-02 | PRKAR2A                                   |
| CNTF Signaling                                 | 6.93E-01      | 1.75E-02 | RPS6KB1                                   |
| Semaphorin Signaling in Neurons                | 6.93E-01      | 1.85E-02 | RHOT1                                     |
| Breast Cancer Regulation by Stathmin1          | 6.89E-01      | 9.35E-03 | ARHGEF6, PRKAR2A                          |
| UVB-Induced MAPK Signaling                     | 6.85E-01      | 1.72E-02 | RPS6KB1                                   |
| Phototransduction Pathway                      | 6.85E-01      | 1.49E-02 | PRKAR2A                                   |
| Toll-like Receptor Signaling                   | 6.64E-01      | 1.56E-02 | MAP4K4                                    |
| EGF Signaling                                  | 6.64E-01      | 1.56E-02 | RPS6KB1                                   |
| Glioma Invasiveness Signaling                  | 6.51E-01      | 1.52E-02 | RHOT1                                     |
| Heparan Sulfate Biosynthesis                   | 6.51E-01      | 1.33E-02 | LIPE                                      |
| Death Receptor Signaling                       | 6.51E-01      | 1.47E-02 | MAP4K4                                    |

|                                              |          |          |                        |
|----------------------------------------------|----------|----------|------------------------|
| IL-15 Signaling                              | 6.31E-01 | 1.39E-02 | AXL                    |
| Serotonin Degradation                        | 6.31E-01 | 1.28E-02 | ALDH2                  |
| Actin Cytoskeleton Signaling                 | 6.23E-01 | 8.26E-03 | ARHGEF6,BAIAP2         |
| ERK5 Signaling                               | 6.13E-01 | 1.47E-02 | RPS6KB1                |
| Cell Cycle: G1/S Checkpoint Regulation       | 6.02E-01 | 1.39E-02 | SMAD4                  |
| PXR/RXR Activation                           | 5.96E-01 | 1.09E-02 | PRKAR2A                |
| Erythropoietin Signaling                     | 5.96E-01 | 1.27E-02 | RPS6KB1                |
| Mitotic Roles of Polo-Like Kinase            | 5.96E-01 | 1.35E-02 | STAG2                  |
| Retinoic acid Mediated Apoptosis Signaling   | 5.96E-01 | 1.37E-02 | DAP3                   |
| Agrin Interactions at Neuromuscular Junction | 5.91E-01 | 1.43E-02 | ARHGEF6                |
| T Helper Cell Differentiation                | 5.85E-01 | 1.39E-02 | TGFBR2                 |
| Growth Hormone Signaling                     | 5.85E-01 | 1.28E-02 | RPS6KB1                |
| Melatonin Signaling                          | 5.8E-01  | 1.23E-02 | PRKAR2A                |
| STAT3 Pathway                                | 5.64E-01 | 1.25E-02 | TGFBR2                 |
| IL-4 Signaling                               | 5.59E-01 | 1.25E-02 | RPS6KB1                |
| FLT3 Signaling in Hematopoietic Progenitor   | 5.54E-01 | 1.27E-02 | RPS6KB1                |
| Leptin Signaling in Obesity                  | 5.54E-01 | 1.18E-02 | PRKAR2A                |
| Dopamine Receptor Signaling                  | 5.49E-01 | 1.04E-02 | PRKAR2A                |
| Acute Myeloid Leukemia Signaling             | 5.45E-01 | 1.19E-02 | RPS6KB1                |
| Axonal Guidance Signaling                    | 5.36E-01 | 6.16E-03 | ARHGEF6,BAIAP2,PRKAR2A |
| Reelin Signaling in Neurons                  | 5.35E-01 | 1.18E-02 | ARHGEF6                |
| ErbB Signaling                               | 5.09E-01 | 1.11E-02 | RPS6KB1                |
| FAK Signaling                                | 5E-01    | 9.43E-03 | ARHGEF6                |
| Neuregulin Signaling                         | 4.96E-01 | 9.62E-03 | RPS6KB1                |
| $\alpha$ -Adrenergic Signaling               | 4.96E-01 | 9.17E-03 | PRKAR2A                |
| CDK5 Signaling                               | 4.96E-01 | 1.03E-02 | PRKAR2A                |
| PAK Signaling                                | 4.96E-01 | 9.09E-03 | ARHGEF6                |
| Apoptosis Signaling                          | 4.96E-01 | 1E-02    | MAP4K4                 |
| UVA-Induced MAPK Signaling                   | 4.84E-01 | 1.02E-02 | RPS6KB1                |
| Xenobiotic Metabolism Signaling              | 4.82E-01 | 6.94E-03 | HMOX1,ALDH18A1         |
| VEGF Signaling                               | 4.8E-01  | 9.17E-03 | ELAVL1                 |
| HMGB1 Signaling                              | 4.77E-01 | 9.17E-03 | RHOT1                  |
| IL-1 Signaling                               | 4.77E-01 | 9.17E-03 | PRKAR2A                |
| PPAR Signaling                               | 4.73E-01 | 9.35E-03 | MAP4K4                 |
| Mouse Embryonic Stem Cell Pluripotency       | 4.69E-01 | 1.01E-02 | SMAD4                  |
| SAPK/JNK Signaling                           | 4.69E-01 | 9.52E-03 | MAP4K4                 |
| p53 Signaling                                | 4.58E-01 | 8.85E-03 | CCNK                   |
| Neuropathic Pain Signaling In Dorsal Horn N  | 4.51E-01 | 9.17E-03 | PRKAR2A                |
| Cholecystokinin/Gastrin-mediated Signaling   | 4.48E-01 | 9.43E-03 | RHOT1                  |
| Paxillin Signaling                           | 4.48E-01 | 8.55E-03 | ARHGEF6                |
| Telomerase Signaling                         | 4.48E-01 | 9.43E-03 | DKC1                   |
| Nitric Oxide Signaling in the Cardiovascular | 4.48E-01 | 8E-03    | PRKAR2A                |
| NGF Signaling                                | 4.28E-01 | 8.2E-03  | RPS6KB1                |
| Oxidative Phosphorylation                    | 4.25E-01 | 8.33E-03 | SDHA                   |
| Renin-Angiotensin Signaling                  | 4.22E-01 | 7.94E-03 | PRKAR2A                |
| Sphingosine-1-phosphate Signaling            | 4.18E-01 | 8.13E-03 | RHOT1                  |
| Role of Tissue Factor in Cancer              | 4.15E-01 | 7.69E-03 | RPS6KB1                |
| Role of NANOG in Mammalian Embryonic S       | 4.12E-01 | 8.4E-03  | SMAD4                  |
| Gas Signaling                                | 4.12E-01 | 8E-03    | PRKAR2A                |
| Corticotropin Releasing Hormone Signaling    | 4.09E-01 | 6.9E-03  | PRKAR2A                |
| IL-6 Signaling                               | 4.01E-01 | 8.06E-03 | MAP4K4                 |
| RhoA Signaling                               | 3.95E-01 | 8.13E-03 | BAIAP2                 |
| Sperm Motility                               | 3.92E-01 | 6.94E-03 | PRKAR2A                |
| Synaptic Long Term Potentiation              | 3.89E-01 | 7.69E-03 | PRKAR2A                |
| LXR/RXR Activation                           | 3.87E-01 | 7.19E-03 | HADH                   |
| P2Y Purigenic Receptor Signaling Pathway     | 3.84E-01 | 6.94E-03 | PRKAR2A                |
| Gai Signaling                                | 3.84E-01 | 7.41E-03 | PRKAR2A                |
| PI3K/AKT Signaling                           | 3.81E-01 | 6.58E-03 | RPS6KB1                |
| Cellular Effects of Sildenafil (Viagra)      | 3.66E-01 | 6.45E-03 | PRKAR2A                |
| GNRH Signaling                               | 3.63E-01 | 6.54E-03 | PRKAR2A                |
| Cardiac $\beta$ -adrenergic Signaling        | 3.51E-01 | 6.33E-03 | PRKAR2A                |
| Relaxin Signaling                            | 3.46E-01 | 6.1E-03  | PRKAR2A                |
| Hepatic Cholestasis                          | 3.42E-01 | 5.46E-03 | PRKAR2A                |
| CXCR4 Signaling                              | 3.12E-01 | 5.75E-03 | RHOT1                  |
| Gap Junction Signaling                       | 3.06E-01 | 5.52E-03 | PRKAR2A                |
| Tec Kinase Signaling                         | 3.06E-01 | 5.43E-03 | RHOT1                  |
| B Cell Receptor Signaling                    | 3E-01    | 5.71E-03 | RPS6KB1                |
| Dopamine-DARPP32 Feedback in cAMP Sign       | 2.93E-01 | 5.35E-03 | PRKAR2A                |
| Acute Phase Response Signaling               | 2.82E-01 | 5.52E-03 | HMOX1                  |
| Wnt/ $\beta$ -catenin Signaling              | 2.78E-01 | 5.71E-03 | TGFBR2                 |
| CREB Signaling in Neurons                    | 2.72E-01 | 4.83E-03 | PRKAR2A                |
| Ephrin Receptor Signaling                    | 2.72E-01 | 4.76E-03 | MAP4K4                 |
| Sertoli Cell-Sertoli Cell Junction Signaling | 2.68E-01 | 5.05E-03 | PRKAR2A                |
| Production of Nitric Oxide and Reactive Oxy  | 2.65E-01 | 4.72E-03 | RHOT1                  |
| Calcium Signaling                            | 2.63E-01 | 4.61E-03 | PRKAR2A                |
| Clathrin-mediated Endocytosis Signaling      | 2.56E-01 | 5.05E-03 | SH3GLB1                |
| ERK/MAPK Signaling                           | 2.51E-01 | 4.74E-03 | PRKAR2A                |
| Integrin Signaling                           | 2.38E-01 | 4.81E-03 | RHOT1                  |
| Role of Osteoblasts, Osteoclasts and Chond   | 2.09E-01 | 4E-03    | SMAD4                  |
| cAMP-mediated signaling                      | 2.09E-01 | 4.42E-03 | PRKAR2A                |
| LPS/IL-1 Mediated Inhibition of RXR Functio  | 2.07E-01 | 4.08E-03 | ALDH18A1               |



|                                        |                                                      |          |          |   |
|----------------------------------------|------------------------------------------------------|----------|----------|---|
| Dermatological Diseases and Conditions | autosomal recessive cutis laxa type IIIA             | 4.35E-03 | ALDH18A1 | 1 |
| Connective Tissue Disorders            | autosomal recessive cutis laxa type IIIA             | 4.35E-03 | ALDH18A1 | 1 |
| Developmental Disorder                 | autosomal recessive cutis laxa type IIIA             | 4.35E-03 | ALDH18A1 | 1 |
| Hereditary Disorder                    | autosomal recessive cutis laxa type IIIA             | 4.35E-03 | ALDH18A1 | 1 |
| Metabolic Disease                      | autosomal recessive cutis laxa type IIIA             | 4.35E-03 | ALDH18A1 | 1 |
| Hereditary Disorder                    | beta-hydroxyisobutyryl-coa deacylase deficiency      | 4.35E-03 | HIBCH    | 1 |
| Metabolic Disease                      | beta-hydroxyisobutyryl-coa deacylase deficiency      | 4.35E-03 | HIBCH    | 1 |
| Cancer                                 | brain astrocytoma                                    | 4.35E-03 | GSR      | 1 |
| Neurological Disease                   | brain astrocytoma                                    | 4.35E-03 | GSR      | 1 |
| Cancer                                 | brainstem glioma                                     | 4.35E-03 | GSR      | 1 |
| Neurological Disease                   | brainstem glioma                                     | 4.35E-03 | GSR      | 1 |
| Small Molecule Biochemistry            | breakdown of heme                                    | 4.35E-03 | HMOX1    | 1 |
| Cancer                                 | cell viability of chronic myelogenous leukemia cells | 4.35E-03 | HMOX1    | 1 |
| Cell Death and Survival                | cell viability of chronic myelogenous leukemia cells | 4.35E-03 | HMOX1    | 1 |
| Tumor Morphology                       | cell viability of chronic myelogenous leukemia cells | 4.35E-03 | HMOX1    | 1 |
| Cancer                                 | chemosensitivity of glioblastoma cells               | 4.35E-03 | TGM2     | 1 |
| Developmental Disorder                 | chromosome Xq28 microdeletion syndrome               | 4.35E-03 | BCAP31   | 1 |
| Hereditary Disorder                    | chromosome Xq28 microdeletion syndrome               | 4.35E-03 | BCAP31   | 1 |
| Tissue Morphology                      | collapse of dorsal aorta                             | 4.35E-03 | SMAD4    | 1 |
| Small Molecule Biochemistry            | conjugation of histamine                             | 4.35E-03 | TGM2     | 1 |
| Neurological Disease                   | damage of nigrostriatum                              | 4.35E-03 | TGM2     | 1 |
| Organismal Injury and Abnormalities    | damage of nigrostriatum                              | 4.35E-03 | TGM2     | 1 |
| Hereditary Disorder                    | deficiency of 3-hydroxyacyl-coa dehydrogenase        | 4.35E-03 | HADH     | 1 |
| Metabolic Disease                      | deficiency of 3-hydroxyacyl-coa dehydrogenase        | 4.35E-03 | HADH     | 1 |
| Embryonic Development                  | degeneration of embryo                               | 4.35E-03 | FLII     | 1 |
| Cellular Compromise                    | degeneration of keratinocytes                        | 4.35E-03 | PLEC     | 1 |
| Small Molecule Biochemistry            | degradation of acetaldehyde                          | 4.35E-03 | ALDH2    | 1 |
| Cellular Growth and Proliferation      | delay in growth of colon cancer cell lines           | 4.35E-03 | TGFBR2   | 1 |
| Cellular Development                   | delay in growth of colon cancer cell lines           | 4.35E-03 | TGFBR2   | 1 |
| Cell Death and Survival                | delay in initiation of regeneration of goblet cells  | 4.35E-03 | TGFBR2   | 1 |
| Cellular Development                   | delay in initiation of regeneration of goblet cells  | 4.35E-03 | TGFBR2   | 1 |
| Tissue Morphology                      | density of beta islet cells                          | 4.35E-03 | RPS6KB1  | 1 |
| Endocrine System Development and Fur   | density of beta islet cells                          | 4.35E-03 | RPS6KB1  | 1 |
| Connective Tissue Development and Fur  | density of osteocytes                                | 4.35E-03 | TGFBR2   | 1 |
| Tissue Morphology                      | density of osteocytes                                | 4.35E-03 | TGFBR2   | 1 |
| Skeletal and Muscular System Developm  | density of osteocytes                                | 4.35E-03 | TGFBR2   | 1 |
| Tissue Morphology                      | deposition of vascular smooth muscle cells           | 4.35E-03 | HMOX1    | 1 |
| Cellular Assembly and Organization     | development of intercalated disks                    | 4.35E-03 | PLEC     | 1 |
| Embryonic Development                  | development of intercalated disks                    | 4.35E-03 | PLEC     | 1 |
| Organismal Development                 | development of intercalated disks                    | 4.35E-03 | PLEC     | 1 |
| Tissue Development                     | development of intercalated disks                    | 4.35E-03 | PLEC     | 1 |
| Organ Development                      | development of intercalated disks                    | 4.35E-03 | PLEC     | 1 |
| Skeletal and Muscular System Developm  | development of intercalated disks                    | 4.35E-03 | PLEC     | 1 |
| Cardiovascular System Development an   | development of intercalated disks                    | 4.35E-03 | PLEC     | 1 |
| Cell-To-Cell Signaling and Interaction | development of intercalated disks                    | 4.35E-03 | PLEC     | 1 |
| Tissue Development                     | differentiation of calvaria                          | 4.35E-03 | TGFBR2   | 1 |
| Cellular Development                   | differentiation of calvaria                          | 4.35E-03 | TGFBR2   | 1 |
| Cellular Development                   | differentiation of spermatocytes                     | 4.35E-03 | HSPA2    | 1 |
| Reproductive System Development and    | differentiation of spermatocytes                     | 4.35E-03 | HSPA2    | 1 |
| Cellular Assembly and Organization     | dissociation of mitochondrial matrix                 | 4.35E-03 | SH3GLB1  | 1 |
| Cellular Assembly and Organization     | dissociation of mitochondrial outer membrane         | 4.35E-03 | SH3GLB1  | 1 |
| Dermatological Diseases and Conditions | dyskeratosis                                         | 4.35E-03 | DKC1     | 1 |
| Inflammatory Response                  | endotoxin tolerance of fibroblast cell lines         | 4.35E-03 | SMAD4    | 1 |
| Organismal Injury and Abnormalities    | epidermolysis bullosa simplex with muscular dystrop  | 4.35E-03 | PLEC     | 1 |
| Dermatological Diseases and Conditions | epidermolysis bullosa simplex with muscular dystrop  | 4.35E-03 | PLEC     | 1 |
| Connective Tissue Disorders            | epidermolysis bullosa simplex with muscular dystrop  | 4.35E-03 | PLEC     | 1 |
| Developmental Disorder                 | epidermolysis bullosa simplex with muscular dystrop  | 4.35E-03 | PLEC     | 1 |
| Hereditary Disorder                    | epidermolysis bullosa simplex with muscular dystrop  | 4.35E-03 | PLEC     | 1 |
| Skeletal and Muscular Disorders        | epidermolysis bullosa simplex with muscular dystrop  | 4.35E-03 | PLEC     | 1 |
| Organismal Injury and Abnormalities    | epidermolysis bullosa simplex with pyloric atresia   | 4.35E-03 | PLEC     | 1 |
| Dermatological Diseases and Conditions | epidermolysis bullosa simplex with pyloric atresia   | 4.35E-03 | PLEC     | 1 |
| Connective Tissue Disorders            | epidermolysis bullosa simplex with pyloric atresia   | 4.35E-03 | PLEC     | 1 |
| Developmental Disorder                 | epidermolysis bullosa simplex with pyloric atresia   | 4.35E-03 | PLEC     | 1 |
| Hereditary Disorder                    | epidermolysis bullosa simplex with pyloric atresia   | 4.35E-03 | PLEC     | 1 |
| Organismal Injury and Abnormalities    | epidermolysis bullosa simplex, ogna type             | 4.35E-03 | PLEC     | 1 |
| Dermatological Diseases and Conditions | epidermolysis bullosa simplex, ogna type             | 4.35E-03 | PLEC     | 1 |
| Connective Tissue Disorders            | epidermolysis bullosa simplex, ogna type             | 4.35E-03 | PLEC     | 1 |
| Developmental Disorder                 | epidermolysis bullosa simplex, ogna type             | 4.35E-03 | PLEC     | 1 |
| Hereditary Disorder                    | epidermolysis bullosa simplex, ogna type             | 4.35E-03 | PLEC     | 1 |
| Cellular Growth and Proliferation      | expansion of invariant natural killer T cells        | 4.35E-03 | SMAD4    | 1 |
| Cellular Development                   | expansion of invariant natural killer T cells        | 4.35E-03 | SMAD4    | 1 |
| Hematological System Development and   | expansion of invariant natural killer T cells        | 4.35E-03 | SMAD4    | 1 |
| Cellular Movement                      | extravasation of breast cancer cell lines            | 4.35E-03 | AXL      | 1 |
| Embryonic Development                  | formation of smooth muscle cells                     | 4.35E-03 | TGM2     | 1 |
| Organismal Development                 | formation of smooth muscle cells                     | 4.35E-03 | TGM2     | 1 |
| Tissue Development                     | formation of smooth muscle cells                     | 4.35E-03 | TGM2     | 1 |
| Cellular Growth and Proliferation      | formation of smooth muscle cells                     | 4.35E-03 | TGM2     | 1 |
| Cellular Development                   | formation of smooth muscle cells                     | 4.35E-03 | TGM2     | 1 |
| Organ Development                      | formation of smooth muscle cells                     | 4.35E-03 | TGM2     | 1 |
| Skeletal and Muscular System Developm  | formation of smooth muscle cells                     | 4.35E-03 | TGM2     | 1 |
| Tissue Development                     | formation of squamous epithelium                     | 4.35E-03 | SMAD4    | 1 |
| Cellular Assembly and Organization     | formation of syncytial-lipoid structures             | 4.35E-03 | LIPE     | 1 |
| Cancer                                 | generalized mycosis fungoides                        | 4.35E-03 | GSR      | 1 |
| Hematological Disease                  | generalized mycosis fungoides                        | 4.35E-03 | GSR      | 1 |
| Dermatological Diseases and Conditions | generalized mycosis fungoides                        | 4.35E-03 | GSR      | 1 |
| Immunological Disease                  | generalized mycosis fungoides                        | 4.35E-03 | GSR      | 1 |
| Inflammatory Disease                   | generalized mycosis fungoides                        | 4.35E-03 | GSR      | 1 |
| Inflammatory Response                  | generalized mycosis fungoides                        | 4.35E-03 | GSR      | 1 |
| Cancer                                 | generalized sezary syndrome                          | 4.35E-03 | GSR      | 1 |
| Hematological Disease                  | generalized sezary syndrome                          | 4.35E-03 | GSR      | 1 |
| Dermatological Diseases and Conditions | generalized sezary syndrome                          | 4.35E-03 | GSR      | 1 |
| Immunological Disease                  | generalized sezary syndrome                          | 4.35E-03 | GSR      | 1 |
| Small Molecule Biochemistry            | generation of bilirubin                              | 4.35E-03 | HMOX1    | 1 |
| Cancer                                 | growth of vulva cancer cells                         | 4.35E-03 | EIF3F    | 1 |
| Cellular Growth and Proliferation      | growth of vulva cancer cells                         | 4.35E-03 | EIF3F    | 1 |
| Cellular Development                   | growth of vulva cancer cells                         | 4.35E-03 | EIF3F    | 1 |
| Tumor Morphology                       | growth of vulva cancer cells                         | 4.35E-03 | EIF3F    | 1 |
| Digestive System Development and Fun   | healing of colon                                     | 4.35E-03 | TGFBR2   | 1 |
| Organismal Functions                   | healing of colon                                     | 4.35E-03 | TGFBR2   | 1 |
| Organismal Functions                   | healing of gastric mucosa                            | 4.35E-03 | HMOX1    | 1 |
| Hematological Disease                  | heme oxygenase-1 deficiency                          | 4.35E-03 | HMOX1    | 1 |
| Developmental Disorder                 | heme oxygenase-1 deficiency                          | 4.35E-03 | HMOX1    | 1 |
| Hereditary Disorder                    | heme oxygenase-1 deficiency                          | 4.35E-03 | HMOX1    | 1 |
| Metabolic Disease                      | heme oxygenase-1 deficiency                          | 4.35E-03 | HMOX1    | 1 |
| Cancer                                 | hereditary nonpolyposis colorectal cancer type 6     | 4.35E-03 | TGFBR2   | 1 |
| Gastrointestinal Disease               | hereditary nonpolyposis colorectal cancer type 6     | 4.35E-03 | TGFBR2   | 1 |
| Hereditary Disorder                    | hereditary nonpolyposis colorectal cancer type 6     | 4.35E-03 | TGFBR2   | 1 |
| Small Molecule Biochemistry            | hydrolysis of monooleoyl-2-O-monooleylglycerol       | 4.35E-03 | LIPE     | 1 |
| Lipid Metabolism                       | hydrolysis of monooleoyl-2-O-monooleylglycerol       | 4.35E-03 | LIPE     | 1 |
| Cardiovascular Disease                 | hypertension of lung                                 | 4.35E-03 | HMOX1    | 1 |
| Respiratory Disease                    | hypertension of lung                                 | 4.35E-03 | HMOX1    | 1 |
| Gene Expression                        | initiation of synthesis of mRNA                      | 4.35E-03 | GTF2E1   | 1 |
| Gastrointestinal Disease               | injury of gastric mucosa                             | 4.35E-03 | HMOX1    | 1 |
| Organismal Injury and Abnormalities    | injury of gastric mucosa                             | 4.35E-03 | HMOX1    | 1 |
| Gastrointestinal Disease               | juvenile gastric polyposis                           | 4.35E-03 | SMAD4    | 1 |
| Cardiovascular Disease                 | juvenile polyposis/hereditary hemorrhagic telangiect | 4.35E-03 | SMAD4    | 1 |
| Gastrointestinal Disease               | juvenile polyposis/hereditary hemorrhagic telangiect | 4.35E-03 | SMAD4    | 1 |
| Dermatological Diseases and Conditions | juvenile polyposis/hereditary hemorrhagic telangiect | 4.35E-03 | SMAD4    | 1 |
| Hereditary Disorder                    | juvenile polyposis/hereditary hemorrhagic telangiect | 4.35E-03 | SMAD4    | 1 |
| Organ Morphology                       | lack of basal layer of epidermis                     | 4.35E-03 | PLEC     | 1 |
| Cellular Function and Maintenance      | localization of germ cells                           | 4.35E-03 | LIPE     | 1 |
| Cellular Movement                      | localization of germ cells                           | 4.35E-03 | LIPE     | 1 |
| Reproductive System Development and    | localization of germ cells                           | 4.35E-03 | LIPE     | 1 |
| Cell Death and Survival                | loss of macrophages                                  | 4.35E-03 | LIPE     | 1 |

|                                                       |                                                           |          |                                                               |    |
|-------------------------------------------------------|-----------------------------------------------------------|----------|---------------------------------------------------------------|----|
| Gastrointestinal Disease                              | malformation of first molar                               | 4.35E-03 | SMAD4                                                         | 1  |
| Connective Tissue Disorders                           | malformation of first molar                               | 4.35E-03 | SMAD4                                                         | 1  |
| Dental Disease                                        | malformation of first molar                               | 4.35E-03 | SMAD4                                                         | 1  |
| Developmental Disorder                                | malformation of first molar                               | 4.35E-03 | SMAD4                                                         | 1  |
| Skeletal and Muscular Disorders                       | malformation of first molar                               | 4.35E-03 | SMAD4                                                         | 1  |
| Gastrointestinal Disease                              | malformation of incisor                                   | 4.35E-03 | SMAD4                                                         | 1  |
| Connective Tissue Disorders                           | malformation of incisor                                   | 4.35E-03 | SMAD4                                                         | 1  |
| Dental Disease                                        | malformation of incisor                                   | 4.35E-03 | SMAD4                                                         | 1  |
| Developmental Disorder                                | malformation of incisor                                   | 4.35E-03 | SMAD4                                                         | 1  |
| Skeletal and Muscular Disorders                       | malformation of incisor                                   | 4.35E-03 | SMAD4                                                         | 1  |
| Connective Tissue Development and Function            | mass of periovarial white adipose tissue                  | 4.35E-03 | LIPE                                                          | 1  |
| Tissue Morphology                                     | mass of periovarial white adipose tissue                  | 4.35E-03 | LIPE                                                          | 1  |
| Cancer                                                | mitosis of squamous carcinoma cells                       | 4.35E-03 | TGFBR2                                                        | 1  |
| Cell Cycle                                            | mitosis of squamous carcinoma cells                       | 4.35E-03 | TGFBR2                                                        | 1  |
| Tumor Morphology                                      | mitosis of squamous carcinoma cells                       | 4.35E-03 | TGFBR2                                                        | 1  |
| Post-Translational Modification                       | oxidation of L-glutamine                                  | 4.35E-03 | HADH                                                          | 1  |
| Small Molecule Biochemistry                           | oxidation of L-glutamine                                  | 4.35E-03 | HADH                                                          | 1  |
| Amino Acid Metabolism                                 | oxidation of L-glutamine                                  | 4.35E-03 | HADH                                                          | 1  |
| Energy Production                                     | oxidation of L-glutamine                                  | 4.35E-03 | HADH                                                          | 1  |
| Cellular Compromise                                   | oxidative stress response of macrophage cancer cell lines | 4.35E-03 | HMOX1                                                         | 1  |
| Cellular Compromise                                   | oxidative stress response of melanoma cell lines          | 4.35E-03 | HMOX1                                                         | 1  |
| Cellular Function and Maintenance                     | paired-pulse facilitation of collateral synapses          | 4.35E-03 | BAIAP2                                                        | 1  |
| Cell-To-Cell Signaling and Interaction                | paired-pulse facilitation of collateral synapses          | 4.35E-03 | BAIAP2                                                        | 1  |
| Nervous System Development and Function               | paired-pulse facilitation of collateral synapses          | 4.35E-03 | BAIAP2                                                        | 1  |
| Cancer                                                | paragangliomas type 2                                     | 4.35E-03 | SDHAF2                                                        | 1  |
| Cancer                                                | paragangliomas type 5                                     | 4.35E-03 | SDHA                                                          | 1  |
| Nucleic Acid Metabolism                               | phosphorylation of dTMP                                   | 4.35E-03 | DTYMK                                                         | 1  |
| Small Molecule Biochemistry                           | phosphorylation of dTMP                                   | 4.35E-03 | DTYMK                                                         | 1  |
| Cellular Function and Maintenance                     | presence of spermatocytes                                 | 4.35E-03 | HSPA2                                                         | 1  |
| Reproductive System Development and Function          | presence of spermatocytes                                 | 4.35E-03 | HSPA2                                                         | 1  |
| Connective Tissue Development and Function            | quantity of adipoblasts                                   | 4.35E-03 | LIPE                                                          | 1  |
| Tissue Morphology                                     | quantity of adipoblasts                                   | 4.35E-03 | LIPE                                                          | 1  |
| Tissue Morphology                                     | quantity of lung tissue                                   | 4.35E-03 | HMOX1                                                         | 1  |
| Respiratory System Development and Function           | quantity of lung tissue                                   | 4.35E-03 | HMOX1                                                         | 1  |
| Cancer                                                | relapsed Hodgkin disease                                  | 4.35E-03 | GSR                                                           | 1  |
| Hematological Disease                                 | relapsed Hodgkin disease                                  | 4.35E-03 | GSR                                                           | 1  |
| Immunological Disease                                 | relapsed Hodgkin disease                                  | 4.35E-03 | GSR                                                           | 1  |
| Cell-To-Cell Signaling and Interaction                | responsiveness of lung cell lines                         | 4.35E-03 | TGFBR2                                                        | 1  |
| Respiratory System Development and Function           | responsiveness of lung cell lines                         | 4.35E-03 | TGFBR2                                                        | 1  |
| Cell Morphology                                       | size of postsynaptic density                              | 4.35E-03 | BAIAP2                                                        | 1  |
| Cellular Assembly and Organization                    | size of postsynaptic density                              | 4.35E-03 | BAIAP2                                                        | 1  |
| Nervous System Development and Function               | size of postsynaptic density                              | 4.35E-03 | BAIAP2                                                        | 1  |
| Cancer                                                | sphere formation of ovarian cancer cell lines             | 4.35E-03 | TGM2                                                          | 1  |
| Cancer                                                | susceptibility to alcohol-related esophageal cancer       | 4.35E-03 | ALDH2                                                         | 1  |
| Gastrointestinal Disease                              | susceptibility to alcohol-related esophageal cancer       | 4.35E-03 | ALDH2                                                         | 1  |
| Hereditary Disorder                                   | susceptibility to alcohol-related esophageal cancer       | 4.35E-03 | ALDH2                                                         | 1  |
| Organismal Injury and Abnormalities                   | susceptibility to hangover                                | 4.35E-03 | ALDH2                                                         | 1  |
| Neurological Disease                                  | tethered cord                                             | 4.35E-03 | SMAD4                                                         | 1  |
| Developmental Disorder                                | tethered cord                                             | 4.35E-03 | SMAD4                                                         | 1  |
| Skeletal and Muscular Disorders                       | tethered cord                                             | 4.35E-03 | SMAD4                                                         | 1  |
| Connective Tissue Development and Function            | thickness of articular cartilage                          | 4.35E-03 | TGFBR2                                                        | 1  |
| Tissue Morphology                                     | thickness of articular cartilage                          | 4.35E-03 | TGFBR2                                                        | 1  |
| Skeletal and Muscular System Development and Function | thickness of articular cartilage                          | 4.35E-03 | TGFBR2                                                        | 1  |
| Tissue Morphology                                     | thickness of fibrous cap                                  | 4.35E-03 | HMOX1                                                         | 1  |
| Small Molecule Biochemistry                           | transamidation of histamine                               | 4.35E-03 | TGM2                                                          | 1  |
| Cellular Development                                  | transdifferentiation of mammary epithelial cells          | 4.35E-03 | SMAD4                                                         | 1  |
| Reproductive System Development and Function          | transdifferentiation of mammary epithelial cells          | 4.35E-03 | SMAD4                                                         | 1  |
| Cellular Development                                  | transdifferentiation of squamous epithelial cells         | 4.35E-03 | SMAD4                                                         | 1  |
| Carbohydrate Metabolism                               | utilization of glycogen                                   | 4.35E-03 | LIPE                                                          | 1  |
| Reproductive System Development and Function          | vacuolation of seminiferous epithelium                    | 4.35E-03 | LIPE                                                          | 1  |
| Hereditary Disorder                                   | variation in IMPDH2 enzyme activity                       | 4.35E-03 | IMPDH2                                                        | 1  |
| Inflammatory Response                                 | variation in IMPDH2 enzyme activity                       | 4.35E-03 | IMPDH2                                                        | 1  |
| Metabolic Disease                                     | variation in IMPDH2 enzyme activity                       | 4.35E-03 | IMPDH2                                                        | 1  |
| Organismal Development                                | vascularization of prostate gland                         | 4.35E-03 | TGFBR2                                                        | 1  |
| Cardiovascular System Development and Function        | vascularization of prostate gland                         | 4.35E-03 | TGFBR2                                                        | 1  |
| Cardiovascular Disease                                | vasospasm of basilar artery                               | 4.35E-03 | HMOX1                                                         | 1  |
| Embryonic Development                                 | gastrulation of embryo                                    | 4.45E-03 | SMAD4,TGFBR2                                                  | 2  |
| Organismal Development                                | gastrulation of embryo                                    | 4.45E-03 | SMAD4,TGFBR2                                                  | 2  |
| Cell-To-Cell Signaling and Interaction                | response of Th2 cells                                     | 4.45E-03 | HMOX1,TGFBR2                                                  | 2  |
| Hematological System Development and Function         | response of Th2 cells                                     | 4.45E-03 | HMOX1,TGFBR2                                                  | 2  |
| Organismal Injury and Abnormalities                   | Lesion Formation                                          | 4.51E-03 | AXL,HMOX1,LIPE,RPS6KB1,SMAD4,TGFBR2,TGM2                      | 7  |
| Hematological Disease                                 | hemolytic anemia                                          | 4.75E-03 | GSR,HMOX1,IMPDH2                                              | 3  |
| Cell Death and Survival                               | cell death of spermatocytes                               | 4.84E-03 | ELAVL1,HSPA2                                                  | 2  |
| Cancer                                                | metastasis of cancer cells                                | 4.84E-03 | PHB,TGFBR2                                                    | 2  |
| Cellular Growth and Proliferation                     | metastasis of cancer cells                                | 4.84E-03 | PHB,TGFBR2                                                    | 2  |
| Cellular Development                                  | metastasis of cancer cells                                | 4.84E-03 | PHB,TGFBR2                                                    | 2  |
| Tumor Morphology                                      | metastasis of cancer cells                                | 4.84E-03 | PHB,TGFBR2                                                    | 2  |
| Small Molecule Biochemistry                           | synthesis of glutamine family amino acid                  | 4.84E-03 | ALDH18A1,BCAT1                                                | 2  |
| Amino Acid Metabolism                                 | synthesis of glutamine family amino acid                  | 4.84E-03 | ALDH18A1,BCAT1                                                | 2  |
| Cellular Movement                                     | invasion of lung cancer cell lines                        | 4.93E-03 | AXL,PHB,SLC12A4                                               | 3  |
| Post-Translational Modification                       | folding of protein                                        | 5.10E-03 | FKBP9,HSPBP1,SH3GLB1                                          | 3  |
| Protein Folding                                       | folding of protein                                        | 5.10E-03 | FKBP9,HSPBP1,SH3GLB1                                          | 3  |
| Molecular Transport                                   | quantity of heavy metal                                   | 5.10E-03 | HMOX1,IREB2,SMAD4                                             | 3  |
| Neurological Disease                                  | Alzheimer's disease                                       | 5.65E-03 | ALDH2,HMOX1,IREB2,PRKAR2A,RPS6KB1,TGFBR2,TGM2,UBQLN1          | 8  |
| Psychological Disorders                               | Alzheimer's disease                                       | 5.65E-03 | ALDH2,HMOX1,IREB2,PRKAR2A,RPS6KB1,TGFBR2,TGM2,UBQLN1          | 8  |
| Metabolic Disease                                     | Alzheimer's disease                                       | 5.65E-03 | ALDH2,HMOX1,IREB2,PRKAR2A,RPS6KB1,TGFBR2,TGM2,UBQLN1          | 8  |
| Molecular Transport                                   | abnormal quantity of fatty acid                           | 5.66E-03 | HADH,LIPE                                                     | 2  |
| Small Molecule Biochemistry                           | abnormal quantity of fatty acid                           | 5.66E-03 | HADH,LIPE                                                     | 2  |
| Lipid Metabolism                                      | abnormal quantity of fatty acid                           | 5.66E-03 | HADH,LIPE                                                     | 2  |
| Cell Death and Survival                               | cell death of tumor cell lines                            | 5.86E-03 | ARHGEF6,AXL,DAP3,DTYMK,EIF3F,ELAVL1,HMOX1,HSPA9,PHB,RAP1GC1   | 16 |
| Small Molecule Biochemistry                           | synthesis of porphyrin                                    | 6.10E-03 | HMOX1,IREB2                                                   | 2  |
| Cell Death and Survival                               | cell death of muscle cells                                | 6.26E-03 | HMOX1,MANF,PHB,PLD2,PLEC,RPS6KB1                              | 6  |
| Organismal Injury and Abnormalities                   | size of lesion                                            | 6.42E-03 | HMOX1,LIPE,RPS6KB1,TGFBR2,TGM2                                | 5  |
| Tissue Morphology                                     | size of lesion                                            | 6.42E-03 | HMOX1,LIPE,RPS6KB1,TGFBR2,TGM2                                | 5  |
| Cellular Development                                  | epithelial-mesenchymal transition                         | 6.43E-03 | PHB,SMAD4,TGFBR2,TGM2                                         | 4  |
| Cellular Development                                  | development of muscle cell lines                          | 6.55E-03 | ELAVL1,RPS6KB1                                                | 2  |
| Cellular Compromise                                   | fragmentation of mitochondria                             | 6.55E-03 | BCAP31,DAP3                                                   | 2  |
| Cellular Function and Maintenance                     | phagocytosis of leukemia cell lines                       | 6.55E-03 | PLD2,TGM2                                                     | 2  |
| Cell-To-Cell Signaling and Interaction                | phagocytosis of leukemia cell lines                       | 6.55E-03 | PLD2,TGM2                                                     | 2  |
| Inflammatory Response                                 | phagocytosis of leukemia cell lines                       | 6.55E-03 | PLD2,TGM2                                                     | 2  |
| Organismal Injury and Abnormalities                   | congenital anomaly of skin                                | 6.84E-03 | ALDH18A1,DKC1,HMOX1,PLEC                                      | 4  |
| Dermatological Diseases and Conditions                | congenital anomaly of skin                                | 6.84E-03 | ALDH18A1,DKC1,HMOX1,PLEC                                      | 4  |
| Developmental Disorder                                | congenital anomaly of skin                                | 6.84E-03 | ALDH18A1,DKC1,HMOX1,PLEC                                      | 4  |
| Cell Death and Survival                               | apoptosis of exocrine cells                               | 7.02E-03 | HMOX1,TGFBR2                                                  | 2  |
| Nucleic Acid Metabolism                               | synthesis of purine nucleotide                            | 7.40E-03 | ALDH2,COASY,HMOX1,IMPDH2                                      | 4  |
| Small Molecule Biochemistry                           | synthesis of purine nucleotide                            | 7.40E-03 | ALDH2,COASY,HMOX1,IMPDH2                                      | 4  |
| Embryonic Development                                 | growth of embryo                                          | 7.55E-03 | FLII,RPS6KB1,SMAD4,USP7                                       | 4  |
| Organismal Development                                | growth of embryo                                          | 7.55E-03 | FLII,RPS6KB1,SMAD4,USP7                                       | 4  |
| Cell Death and Survival                               | apoptosis                                                 | 8.22E-03 | ALDH2,ARHGEF6,AXL,BCAP31,DAP3,DKC1,DTYMK,EIF3F,ELAVL1,GSR,H2A | 24 |
| Tissue Morphology                                     | abnormal quantity of leukocytes                           | 8.45E-03 | ARHGEF6,HMOX1,IMPDH2                                          | 3  |
| Hematological System Development and Function         | abnormal quantity of leukocytes                           | 8.45E-03 | ARHGEF6,HMOX1,IMPDH2                                          | 3  |
| Cellular Movement                                     | migration of microvascular endothelial cells              | 8.50E-03 | ARHGEF6,TGFBR2                                                | 2  |
| Cardiovascular System Development and Function        | migration of microvascular endothelial cells              | 8.50E-03 | ARHGEF6,TGFBR2                                                | 2  |
| Tissue Morphology                                     | quantity of Purkinje cells                                | 8.50E-03 | IREB2,SMAD4                                                   | 2  |
| Nervous System Development and Function               | quantity of Purkinje cells                                | 8.50E-03 | IREB2,SMAD4                                                   | 2  |
| Developmental Disorder                                | Hoyeraal-Hreidarsson syndrome                             | 8.67E-03 | DKC1                                                          | 1  |
| Hereditary Disorder                                   | Hoyeraal-Hreidarsson syndrome                             | 8.67E-03 | DKC1                                                          | 1  |
| Cell Morphology                                       | abnormal morphology of spongiotrophoblasts                | 8.67E-03 | ELAVL1                                                        | 1  |
| Reproductive System Development and Function          | abnormal morphology of spongiotrophoblasts                | 8.67E-03 | ELAVL1                                                        | 1  |
| Organ Morphology                                      | abnormal morphology of spongiotrophoblasts                | 8.67E-03 | ELAVL1                                                        | 1  |
| Cellular Assembly and Organization                    | accumulation of actin stress fibers                       | 8.67E-03 | PLEC                                                          | 1  |
| Cellular Assembly and Organization                    | accumulation of focal adhesions                           | 8.67E-03 | PLEC                                                          | 1  |
| Tissue Development                                    | accumulation of focal adhesions                           | 8.67E-03 | PLEC                                                          | 1  |
| Cell-To-Cell Signaling and Interaction                | accumulation of focal adhesions                           | 8.67E-03 | PLEC                                                          | 1  |



|                                                                            |                                                        |          |                                                               |    |
|----------------------------------------------------------------------------|--------------------------------------------------------|----------|---------------------------------------------------------------|----|
| Reproductive System Development and Cell-To-Cell Signaling and Interaction | activation of breast cell lines                        | 8.67E-03 | AXL                                                           | 1  |
| Cellular Assembly and Organization                                         | activation of breast cell lines                        | 8.67E-03 | AXL                                                           | 1  |
| Tissue Development                                                         | aggregation of insect cell lines                       | 8.67E-03 | AXL                                                           | 1  |
| Cancer                                                                     | aggregation of insect cell lines                       | 8.67E-03 | AXL                                                           | 1  |
| Neurological Disease                                                       | anaplastic oligodendroglioma                           | 8.67E-03 | GSR                                                           | 1  |
| Cell Death and Survival                                                    | anaplastic oligodendroglioma                           | 8.67E-03 | GSR                                                           | 1  |
| Cellular Growth and Proliferation                                          | apoptosis of gastric mucous cells                      | 8.67E-03 | HMOX1                                                         | 1  |
| Cellular Development                                                       | arrest in growth of skin cancer cell lines             | 8.67E-03 | SMAD4                                                         | 1  |
| Nucleic Acid Metabolism                                                    | arrest in growth of skin cancer cell lines             | 8.67E-03 | SMAD4                                                         | 1  |
| Small Molecule Biochemistry                                                | biosynthesis of dTDP                                   | 8.67E-03 | DTYMK                                                         | 1  |
| Small Molecule Biochemistry                                                | biosynthesis of dTDP                                   | 8.67E-03 | DTYMK                                                         | 1  |
| Organismal Development                                                     | biosynthesis of protoporphyrinogen                     | 8.67E-03 | IREB2                                                         | 1  |
| Cellular Development                                                       | branching of bile duct                                 | 8.67E-03 | SMAD4                                                         | 1  |
| Digestive System Development and Function                                  | branching of bile duct                                 | 8.67E-03 | SMAD4                                                         | 1  |
| Small Molecule Biochemistry                                                | branching of bile duct                                 | 8.67E-03 | SMAD4                                                         | 1  |
| Lipid Metabolism                                                           | catabolism of diacylglycerol                           | 8.67E-03 | LIPE                                                          | 1  |
| Small Molecule Biochemistry                                                | catabolism of diacylglycerol                           | 8.67E-03 | LIPE                                                          | 1  |
| Tissue Morphology                                                          | cleavage of heme                                       | 8.67E-03 | HMOX1                                                         | 1  |
| Cardiovascular System Development and Function                             | contraction of arteriole                               | 8.67E-03 | HMOX1                                                         | 1  |
| Protein Synthesis                                                          | contraction of arteriole                               | 8.67E-03 | HMOX1                                                         | 1  |
| Drug Metabolism                                                            | conversion of glutathione                              | 8.67E-03 | GSR                                                           | 1  |
| Small Molecule Biochemistry                                                | conversion of glutathione                              | 8.67E-03 | GSR                                                           | 1  |
| Neurological Disease                                                       | conversion of heme                                     | 8.67E-03 | HMOX1                                                         | 1  |
| Organismal Injury and Abnormalities                                        | damage of brain tissue                                 | 8.67E-03 | HMOX1                                                         | 1  |
| Embryonic Development                                                      | damage of brain tissue                                 | 8.67E-03 | HMOX1                                                         | 1  |
| Organismal Development                                                     | development of testis cord                             | 8.67E-03 | SMAD4                                                         | 1  |
| Tissue Development                                                         | development of testis cord                             | 8.67E-03 | SMAD4                                                         | 1  |
| Organismal Development                                                     | development of testis cord                             | 8.67E-03 | SMAD4                                                         | 1  |
| Tissue Development                                                         | development of vascular endothelial tissue             | 8.67E-03 | TGFBR2                                                        | 1  |
| Cardiovascular System Development and Function                             | development of vascular endothelial tissue             | 8.67E-03 | TGFBR2                                                        | 1  |
| Cellular Development                                                       | development of vascular endothelial tissue             | 8.67E-03 | TGFBR2                                                        | 1  |
| Reproductive System Development and Function                               | differentiation of prostate cell lines                 | 8.67E-03 | TGFBR2                                                        | 1  |
| Developmental Disorder                                                     | differentiation of prostate cell lines                 | 8.67E-03 | TGFBR2                                                        | 1  |
| Inflammatory Response                                                      | dysplasia of bile duct                                 | 8.67E-03 | SMAD4                                                         | 1  |
| Inflammatory Response                                                      | endotoxin tolerance of bone marrow-derived macrophages | 8.67E-03 | SMAD4                                                         | 1  |
| Organismal Development                                                     | endotoxin tolerance of leukemia cell lines             | 8.67E-03 | SMAD4                                                         | 1  |
| Protein Synthesis                                                          | formation of ascitic fluid                             | 8.67E-03 | TGFBR2                                                        | 1  |
| Cancer                                                                     | frameshifting of ribosome                              | 8.67E-03 | DKC1                                                          | 1  |
| Cellular Growth and Proliferation                                          | initiation of formation of papilloma                   | 8.67E-03 | TGFBR2                                                        | 1  |
| Cellular Development                                                       | initiation of formation of papilloma                   | 8.67E-03 | TGFBR2                                                        | 1  |
| Dermatological Diseases and Conditions                                     | initiation of formation of papilloma                   | 8.67E-03 | TGFBR2                                                        | 1  |
| Tumor Morphology                                                           | initiation of formation of papilloma                   | 8.67E-03 | TGFBR2                                                        | 1  |
| Cancer                                                                     | intimal hyperplasia of femoral artery                  | 8.67E-03 | AXL                                                           | 1  |
| Cardiovascular Disease                                                     | intimal hyperplasia of femoral artery                  | 8.67E-03 | AXL                                                           | 1  |
| Cardiovascular System Development and Function                             | intimal hyperplasia of femoral artery                  | 8.67E-03 | AXL                                                           | 1  |
| Cancer                                                                     | intramucosal carcinoma                                 | 8.67E-03 | SMAD4                                                         | 1  |
| Cancer                                                                     | keratocystic odontogenic tumor                         | 8.67E-03 | SMAD4                                                         | 1  |
| Organismal Injury and Abnormalities                                        | macroorchidism                                         | 8.67E-03 | RPS6KB1                                                       | 1  |
| Reproductive System Disease                                                | macroorchidism                                         | 8.67E-03 | RPS6KB1                                                       | 1  |
| Developmental Disorder                                                     | macroorchidism                                         | 8.67E-03 | RPS6KB1                                                       | 1  |
| Hereditary Disorder                                                        | macroorchidism                                         | 8.67E-03 | RPS6KB1                                                       | 1  |
| Cardiovascular System Development and Function                             | mass of right ventricle                                | 8.67E-03 | HMOX1                                                         | 1  |
| Organ Morphology                                                           | mass of right ventricle                                | 8.67E-03 | HMOX1                                                         | 1  |
| Connective Tissue Disorders                                                | metaplasia of cartilage tissue                         | 8.67E-03 | TGFBR2                                                        | 1  |
| Developmental Disorder                                                     | metaplasia of cartilage tissue                         | 8.67E-03 | TGFBR2                                                        | 1  |
| Skeletal and Muscular Disorders                                            | metaplasia of cartilage tissue                         | 8.67E-03 | TGFBR2                                                        | 1  |
| Cancer                                                                     | metastasis of forestomach                              | 8.67E-03 | SMAD4                                                         | 1  |
| Gastrointestinal Disease                                                   | metastasis of forestomach                              | 8.67E-03 | SMAD4                                                         | 1  |
| Cancer                                                                     | metastasis of liver cells                              | 8.67E-03 | TGFBR2                                                        | 1  |
| Gastrointestinal Disease                                                   | metastasis of liver cells                              | 8.67E-03 | TGFBR2                                                        | 1  |
| Hepatic System Disease                                                     | metastasis of liver cells                              | 8.67E-03 | TGFBR2                                                        | 1  |
| Cellular Movement                                                          | migration of adenocarcinoma cell lines                 | 8.67E-03 | TGM2                                                          | 1  |
| Cell Cycle                                                                 | mitogenesis of Schwann cells                           | 8.67E-03 | RPS6KB1                                                       | 1  |
| Nervous System Development and Function                                    | mitogenesis of Schwann cells                           | 8.67E-03 | RPS6KB1                                                       | 1  |
| Cell Morphology                                                            | modification of ovarian cancer cell lines              | 8.67E-03 | TGM2                                                          | 1  |
| Respiratory System Development and Function                                | morphogenesis of bronchus                              | 8.67E-03 | TGFBR2                                                        | 1  |
| Connective Tissue Development and Function                                 | morphology of synovial membrane                        | 8.67E-03 | TGFBR2                                                        | 1  |
| Tissue Morphology                                                          | morphology of synovial membrane                        | 8.67E-03 | TGFBR2                                                        | 1  |
| Skeletal and Muscular System Development and Function                      | morphology of synovial membrane                        | 8.67E-03 | TGFBR2                                                        | 1  |
| Post-Translational Modification                                            | nitrosation of protein                                 | 8.67E-03 | ALDH2                                                         | 1  |
| Small Molecule Biochemistry                                                | oxidation of heme                                      | 8.67E-03 | HMOX1                                                         | 1  |
| Energy Production                                                          | oxidation of heme                                      | 8.67E-03 | HMOX1                                                         | 1  |
| Cancer                                                                     | pancreatic intraductal papillary mucinous tumor        | 8.67E-03 | SMAD4                                                         | 1  |
| Endocrine System Disorders                                                 | pancreatic intraductal papillary mucinous tumor        | 8.67E-03 | SMAD4                                                         | 1  |
| Gastrointestinal Disease                                                   | pancreatic intraductal papillary mucinous tumor        | 8.67E-03 | SMAD4                                                         | 1  |
| Endocrine System Development and Function                                  | proportion of beta islet cells                         | 8.67E-03 | RPS6KB1                                                       | 1  |
| Amino Acid Metabolism                                                      | quantity of L-aspartic acid                            | 8.67E-03 | HADH                                                          | 1  |
| Cancer                                                                     | recurrent breast cancer                                | 8.67E-03 | TGFBR2                                                        | 1  |
| Organismal Injury and Abnormalities                                        | recurrent breast cancer                                | 8.67E-03 | TGFBR2                                                        | 1  |
| Reproductive System Disease                                                | recurrent breast cancer                                | 8.67E-03 | TGFBR2                                                        | 1  |
| Cancer                                                                     | recurrent non Hodgkin's lymphoma                       | 8.67E-03 | GSR                                                           | 1  |
| Hematological Disease                                                      | recurrent non Hodgkin's lymphoma                       | 8.67E-03 | GSR                                                           | 1  |
| Immunological Disease                                                      | recurrent non Hodgkin's lymphoma                       | 8.67E-03 | GSR                                                           | 1  |
| Cellular Function and Maintenance                                          | reorganization of cortical actin filaments             | 8.67E-03 | PLD2                                                          | 1  |
| Cell Morphology                                                            | reorganization of cortical actin filaments             | 8.67E-03 | PLD2                                                          | 1  |
| Cellular Assembly and Organization                                         | reorganization of cortical actin filaments             | 8.67E-03 | PLD2                                                          | 1  |
| Cell Morphology                                                            | ruffling of melanoma cell lines                        | 8.67E-03 | DNMBP                                                         | 1  |
| Free Radical Scavenging                                                    | scavenging of superoxide                               | 8.67E-03 | GSR                                                           | 1  |
| Cell-To-Cell Signaling and Interaction                                     | signaling of carcinoma cell lines                      | 8.67E-03 | GOLPH3                                                        | 1  |
| Cell-To-Cell Signaling and Interaction                                     | signaling of lung cancer cell lines                    | 8.67E-03 | GOLPH3                                                        | 1  |
| Cell-To-Cell Signaling and Interaction                                     | signaling of melanocytes                               | 8.67E-03 | GOLPH3                                                        | 1  |
| Cell Morphology                                                            | size of carcinoma cell lines                           | 8.67E-03 | GOLPH3                                                        | 1  |
| Cell Morphology                                                            | size of lung cancer cell lines                         | 8.67E-03 | GOLPH3                                                        | 1  |
| Cellular Assembly and Organization                                         | stabilization of hemidesmosomes                        | 8.67E-03 | PLEC                                                          | 1  |
| Developmental Disorder                                                     | succinate-coenzyme q reductase deficiency              | 8.67E-03 | SDHA                                                          | 1  |
| Hereditary Disorder                                                        | succinate-coenzyme q reductase deficiency              | 8.67E-03 | SDHA                                                          | 1  |
| Metabolic Disease                                                          | succinate-coenzyme q reductase deficiency              | 8.67E-03 | SDHA                                                          | 1  |
| Cardiovascular Disease                                                     | surface area of fatty lesion                           | 8.67E-03 | TGFBR2                                                        | 1  |
| Organismal Injury and Abnormalities                                        | surface area of fatty lesion                           | 8.67E-03 | TGFBR2                                                        | 1  |
| Tissue Morphology                                                          | surface area of fatty lesion                           | 8.67E-03 | TGFBR2                                                        | 1  |
| Cardiovascular System Development and Function                             | survival of heart                                      | 8.67E-03 | HMOX1                                                         | 1  |
| Cell Death and Survival                                                    | survival of invariant natural killer T cells           | 8.67E-03 | SMAD4                                                         | 1  |
| Hematological System Development and Function                              | survival of invariant natural killer T cells           | 8.67E-03 | SMAD4                                                         | 1  |
| Cancer                                                                     | tumorigenesis of cholangiocarcinoma                    | 8.67E-03 | SMAD4                                                         | 1  |
| Gastrointestinal Disease                                                   | tumorigenesis of cholangiocarcinoma                    | 8.67E-03 | SMAD4                                                         | 1  |
| Cellular Growth and Proliferation                                          | tumorigenesis of cholangiocarcinoma                    | 8.67E-03 | SMAD4                                                         | 1  |
| Cellular Development                                                       | tumorigenesis of cholangiocarcinoma                    | 8.67E-03 | SMAD4                                                         | 1  |
| Tumor Morphology                                                           | tumorigenesis of cholangiocarcinoma                    | 8.67E-03 | SMAD4                                                         | 1  |
| Hepatic System Disease                                                     | tumorigenesis of cholangiocarcinoma                    | 8.67E-03 | SMAD4                                                         | 1  |
| Cell Death and Survival                                                    | apoptosis of vascular endothelial cells                | 8.69E-03 | ALDH2,AXL,HMOX1                                               | 3  |
| Gene Expression                                                            | initiation of expression of RNA                        | 8.93E-03 | EIF3F,LIPE,THRSP3                                             | 3  |
| Nucleic Acid Metabolism                                                    | synthesis of nucleotide                                | 8.94E-03 | ALDH2,COASY,DTYMK,HMOX1,IMPDH2,PRPSAP1                        | 6  |
| Small Molecule Biochemistry                                                | synthesis of nucleotide                                | 8.94E-03 | ALDH2,COASY,DTYMK,HMOX1,IMPDH2,PRPSAP1                        | 6  |
| Cellular Growth and Proliferation                                          | proliferation of cervical cancer cell lines            | 8.94E-03 | ELAVL1,H2AFY,NFS1,SLC12A4                                     | 4  |
| Cellular Development                                                       | proliferation of cervical cancer cell lines            | 8.94E-03 | ELAVL1,H2AFY,NFS1,SLC12A4                                     | 4  |
| Cancer                                                                     | recurrent cancer                                       | 9.02E-03 | GSR,TGFBR2                                                    | 2  |
| Cardiovascular Disease                                                     | aortic disorder                                        | 9.19E-03 | HMOX1,SMAD4,TGFBR2                                            | 3  |
| Small Molecule Biochemistry                                                | synthesis of L-amino acid                              | 9.56E-03 | ALDH18A1,BCAT1                                                | 2  |
| Amino Acid Metabolism                                                      | synthesis of L-amino acid                              | 9.56E-03 | ALDH18A1,BCAT1                                                | 2  |
| Cell Death and Survival                                                    | anoikis                                                | 9.70E-03 | DAP3,SMAD4,TGM2                                               | 3  |
| Cellular Growth and Proliferation                                          | proliferation of cells                                 | 9.83E-03 | ARHGEF6,AXL,BCAP31,BCAT1,DAP3,DKC1,DTYMK,EIF3F,ELAVL1,FLII,GC | 30 |
| Cellular Growth and Proliferation                                          | proliferation of smooth muscle cells                   | 9.88E-03 | ELAVL1,HMOX1,RPS6KB1,TGFBR2,TGM2                              | 5  |
| Cellular Development                                                       | proliferation of smooth muscle cells                   | 9.88E-03 | ELAVL1,HMOX1,RPS6KB1,TGFBR2,TGM2                              | 5  |

|                                             |                                                            |          |                                      |   |
|---------------------------------------------|------------------------------------------------------------|----------|--------------------------------------|---|
| Skeletal and Muscular System Development    | proliferation of smooth muscle cells                       | 9.88E-03 | ELAVL1,HMOX1,RPS6KB1,TGFBR2,TGM2     | 5 |
| Cancer                                      | incidence of carcinoma                                     | 1.01E-02 | DKC1,SMAD4                           | 2 |
| Cell Morphology                             | ruffling                                                   | 1.05E-02 | BAIAP2,DNMBP,HMOX1                   | 3 |
| Cancer                                      | tumorigenesis of adenocarcinoma                            | 1.05E-02 | DKC1,SMAD4,TGFBR2                    | 3 |
| Cellular Growth and Proliferation           | tumorigenesis of adenocarcinoma                            | 1.05E-02 | DKC1,SMAD4,TGFBR2                    | 3 |
| Cellular Development                        | tumorigenesis of adenocarcinoma                            | 1.05E-02 | DKC1,SMAD4,TGFBR2                    | 3 |
| Tumor Morphology                            | tumorigenesis of adenocarcinoma                            | 1.05E-02 | DKC1,SMAD4,TGFBR2                    | 3 |
| Cellular Movement                           | invasion of ovarian cancer cell lines                      | 1.07E-02 | AXL,MAP4K4                           | 2 |
| Gene Expression                             | stabilization of mRNA                                      | 1.07E-02 | ELAVL1,THRAP3                        | 2 |
| RNA Post-Transcriptional Modification       | stabilization of mRNA                                      | 1.07E-02 | ELAVL1,THRAP3                        | 2 |
| RNA Damage and Repair                       | stabilization of mRNA                                      | 1.07E-02 | ELAVL1,THRAP3                        | 2 |
| Embryonic Development                       | development of muscle                                      | 1.12E-02 | ELAVL1,MYOF,PLEC,RPS6KB1,TGFBR2,TGM2 | 6 |
| Organismal Development                      | development of muscle                                      | 1.12E-02 | ELAVL1,MYOF,PLEC,RPS6KB1,TGFBR2,TGM2 | 6 |
| Tissue Development                          | development of muscle                                      | 1.12E-02 | ELAVL1,MYOF,PLEC,RPS6KB1,TGFBR2,TGM2 | 6 |
| Organ Development                           | development of muscle                                      | 1.12E-02 | ELAVL1,MYOF,PLEC,RPS6KB1,TGFBR2,TGM2 | 6 |
| Skeletal and Muscular System Development    | development of muscle                                      | 1.12E-02 | ELAVL1,MYOF,PLEC,RPS6KB1,TGFBR2,TGM2 | 6 |
| Cellular Growth and Proliferation           | proliferation of mammary epithelial cells                  | 1.13E-02 | SMAD4,TGM2                           | 2 |
| Cellular Development                        | proliferation of mammary epithelial cells                  | 1.13E-02 | SMAD4,TGM2                           | 2 |
| Reproductive System Development and         | proliferation of mammary epithelial cells                  | 1.13E-02 | SMAD4,TGM2                           | 2 |
| Cancer                                      | tumorigenesis of neuroendocrine tumor                      | 1.13E-02 | DKC1,SMAD4                           | 2 |
| Cellular Growth and Proliferation           | tumorigenesis of neuroendocrine tumor                      | 1.13E-02 | DKC1,SMAD4                           | 2 |
| Cellular Development                        | tumorigenesis of neuroendocrine tumor                      | 1.13E-02 | DKC1,SMAD4                           | 2 |
| Tumor Morphology                            | tumorigenesis of neuroendocrine tumor                      | 1.13E-02 | DKC1,SMAD4                           | 2 |
| Molecular Transport                         | quantity of insulin in blood                               | 1.22E-02 | HADH,LIPE,RPS6KB1,TGM2               | 4 |
| Small Molecule Biochemistry                 | quantity of insulin in blood                               | 1.22E-02 | HADH,LIPE,RPS6KB1,TGM2               | 4 |
| Protein Synthesis                           | quantity of insulin in blood                               | 1.22E-02 | HADH,LIPE,RPS6KB1,TGM2               | 4 |
| Endocrine System Development and Function   | quantity of insulin in blood                               | 1.22E-02 | HADH,LIPE,RPS6KB1,TGM2               | 4 |
| Embryonic Development                       | gametogenesis                                              | 1.29E-02 | AXL,ELAVL1,GSR,HSPA2,LIPE,RPS6KB1    | 6 |
| Organismal Development                      | gametogenesis                                              | 1.29E-02 | AXL,ELAVL1,GSR,HSPA2,LIPE,RPS6KB1    | 6 |
| Tissue Development                          | gametogenesis                                              | 1.29E-02 | AXL,ELAVL1,GSR,HSPA2,LIPE,RPS6KB1    | 6 |
| Cellular Development                        | gametogenesis                                              | 1.29E-02 | AXL,ELAVL1,GSR,HSPA2,LIPE,RPS6KB1    | 6 |
| Organ Development                           | gametogenesis                                              | 1.29E-02 | AXL,ELAVL1,GSR,HSPA2,LIPE,RPS6KB1    | 6 |
| Reproductive System Development and         | gametogenesis                                              | 1.29E-02 | AXL,ELAVL1,GSR,HSPA2,LIPE,RPS6KB1    | 6 |
| Tissue Development                          | accumulation of carcinoma cell lines                       | 1.30E-02 | HMOX1                                | 1 |
| Skeletal and Muscular System Development    | activation of smooth muscle cell lines                     | 1.30E-02 | TGM2                                 | 1 |
| Cell-To-Cell Signaling and Interaction      | activation of smooth muscle cell lines                     | 1.30E-02 | TGM2                                 | 1 |
| Connective Tissue Development and Function  | adhesion of hOB cells                                      | 1.30E-02 | TGM2                                 | 1 |
| Tissue Development                          | adhesion of hOB cells                                      | 1.30E-02 | TGM2                                 | 1 |
| Skeletal and Muscular System Development    | adhesion of hOB cells                                      | 1.30E-02 | TGM2                                 | 1 |
| Cell-To-Cell Signaling and Interaction      | adhesion of hOB cells                                      | 1.30E-02 | TGM2                                 | 1 |
| Connective Tissue Development and Function  | adipogenesis of white adipocytes                           | 1.30E-02 | LIPE                                 | 1 |
| Cellular Development                        | adipogenesis of white adipocytes                           | 1.30E-02 | LIPE                                 | 1 |
| Embryonic Development                       | anoikis of embryonic cell lines                            | 1.30E-02 | DAP3                                 | 1 |
| Cell Death and Survival                     | anoikis of embryonic cell lines                            | 1.30E-02 | DAP3                                 | 1 |
| Cell Cycle                                  | arrest in G1 phase of keratinocytes                        | 1.30E-02 | TGFBR2                               | 1 |
| Hair and Skin Development and Function      | arrest in G1 phase of keratinocytes                        | 1.30E-02 | TGFBR2                               | 1 |
| Cellular Growth and Proliferation           | arrest in growth of muscle cell lines                      | 1.30E-02 | RPS6KB1                              | 1 |
| Cellular Development                        | arrest in growth of muscle cell lines                      | 1.30E-02 | RPS6KB1                              | 1 |
| Skeletal and Muscular System Development    | arrest in growth of muscle cell lines                      | 1.30E-02 | RPS6KB1                              | 1 |
| Tissue Development                          | attachment of cervical cancer cell lines                   | 1.30E-02 | BCAP31                               | 1 |
| Cell-To-Cell Signaling and Interaction      | attachment of cervical cancer cell lines                   | 1.30E-02 | BCAP31                               | 1 |
| Cellular Function and Maintenance           | axonal transport of mitochondria                           | 1.30E-02 | RHOT1                                | 1 |
| Cellular Assembly and Organization          | axonal transport of mitochondria                           | 1.30E-02 | RHOT1                                | 1 |
| Nervous System Development and Function     | axonal transport of mitochondria                           | 1.30E-02 | RHOT1                                | 1 |
| Cardiovascular Disease                      | bleeding of atherosclerotic lesion                         | 1.30E-02 | TGFBR2                               | 1 |
| Organismal Injury and Abnormalities         | bleeding of atherosclerotic lesion                         | 1.30E-02 | TGFBR2                               | 1 |
| Cellular Movement                           | chemokinesis of macrophage cancer cell lines               | 1.30E-02 | PLD2                                 | 1 |
| Neurological Disease                        | chronic progressive external ophthalmoplegia               | 1.30E-02 | GOLPH3                               | 1 |
| Ophthalmic Disease                          | chronic progressive external ophthalmoplegia               | 1.30E-02 | GOLPH3                               | 1 |
| Skeletal and Muscular Disorders             | chronic progressive external ophthalmoplegia               | 1.30E-02 | GOLPH3                               | 1 |
| Cellular Assembly and Organization          | compaction of Golgi apparatus                              | 1.30E-02 | GOLPH3                               | 1 |
| Free Radical Scavenging                     | concentration of reactive oxygen species                   | 1.30E-02 | HMOX1                                | 1 |
| Small Molecule Biochemistry                 | conversion of triacylglycerol                              | 1.30E-02 | LIPE                                 | 1 |
| Lipid Metabolism                            | conversion of triacylglycerol                              | 1.30E-02 | LIPE                                 | 1 |
| Cellular Growth and Proliferation           | cytostasis of acinar gland cells                           | 1.30E-02 | TGFBR2                               | 1 |
| Endocrine System Development and Function   | cytostasis of acinar gland cells                           | 1.30E-02 | TGFBR2                               | 1 |
| Cellular Compromise                         | degeneration of nucleus                                    | 1.30E-02 | TGFBR2                               | 1 |
| Cell Cycle                                  | delay in G1/S phase transition of breast cancer cell lines | 1.30E-02 | ELAVL1                               | 1 |
| Molecular Transport                         | delay in clearance of D-glucose                            | 1.30E-02 | LIPE                                 | 1 |
| Small Molecule Biochemistry                 | delay in clearance of D-glucose                            | 1.30E-02 | LIPE                                 | 1 |
| Carbohydrate Metabolism                     | delay in clearance of D-glucose                            | 1.30E-02 | LIPE                                 | 1 |
| Tissue Morphology                           | density of skeletal muscle cells                           | 1.30E-02 | MYOF                                 | 1 |
| Embryonic Development                       | development of cumulus cells                               | 1.30E-02 | SMAD4                                | 1 |
| Organismal Development                      | development of cumulus cells                               | 1.30E-02 | SMAD4                                | 1 |
| Tissue Development                          | development of cumulus cells                               | 1.30E-02 | SMAD4                                | 1 |
| Cellular Development                        | development of cumulus cells                               | 1.30E-02 | SMAD4                                | 1 |
| Organ Development                           | development of cumulus cells                               | 1.30E-02 | SMAD4                                | 1 |
| Reproductive System Development and         | development of cumulus cells                               | 1.30E-02 | SMAD4                                | 1 |
| Renal and Urological System Development and | development of cumulus cells                               | 1.30E-02 | SMAD4                                | 1 |
| Cellular Assembly and Organization          | disruption of PML nuclear bodies                           | 1.30E-02 | USP7                                 | 1 |
| Cellular Compromise                         | disruption of PML nuclear bodies                           | 1.30E-02 | USP7                                 | 1 |
| Cellular Development                        | epithelial-mesenchymal transition of hepatocytes           | 1.30E-02 | SMAD4                                | 1 |
| Embryonic Development                       | erythropoiesis of bone marrow cells                        | 1.30E-02 | AXL                                  | 1 |
| Organismal Development                      | erythropoiesis of bone marrow cells                        | 1.30E-02 | AXL                                  | 1 |
| Tissue Development                          | erythropoiesis of bone marrow cells                        | 1.30E-02 | AXL                                  | 1 |
| Cellular Development                        | erythropoiesis of bone marrow cells                        | 1.30E-02 | AXL                                  | 1 |
| Organ Development                           | erythropoiesis of bone marrow cells                        | 1.30E-02 | AXL                                  | 1 |
| Hematological System Development and        | erythropoiesis of bone marrow cells                        | 1.30E-02 | AXL                                  | 1 |
| Hematopoiesis                               | erythropoiesis of bone marrow cells                        | 1.30E-02 | AXL                                  | 1 |
| Lymphoid Tissue Structure and Development   | erythropoiesis of bone marrow cells                        | 1.30E-02 | AXL                                  | 1 |
| Gene Expression                             | inactivation of mouse X chromosome                         | 1.30E-02 | DKC1                                 | 1 |
| Cancer                                      | invasion of submucosa                                      | 1.30E-02 | SMAD4                                | 1 |
| Connective Tissue Disorders                 | invasion of submucosa                                      | 1.30E-02 | SMAD4                                | 1 |
| Small Molecule Biochemistry                 | lipolysis of fat                                           | 1.30E-02 | LIPE                                 | 1 |
| Lipid Metabolism                            | lipolysis of fat                                           | 1.30E-02 | LIPE                                 | 1 |
| Embryonic Development                       | misalignment of outflow tract                              | 1.30E-02 | SMAD4                                | 1 |
| Cellular Movement                           | mobility of breast cancer cell lines                       | 1.30E-02 | TGFBR2                               | 1 |
| Embryonic Development                       | morphogenesis of metanephric mesenchyme                    | 1.30E-02 | SMAD4                                | 1 |
| Organismal Development                      | morphogenesis of metanephric mesenchyme                    | 1.30E-02 | SMAD4                                | 1 |
| Tissue Development                          | morphogenesis of metanephric mesenchyme                    | 1.30E-02 | SMAD4                                | 1 |
| Tissue Morphology                           | morphology of ductal epithelium                            | 1.30E-02 | TGFBR2                               | 1 |
| Cellular Function and Maintenance           | organization of kidney cell lines                          | 1.30E-02 | RILPL1                               | 1 |
| Cancer                                      | progression of secondary tumor                             | 1.30E-02 | TGFBR2                               | 1 |
| Tumor Morphology                            | progression of secondary tumor                             | 1.30E-02 | TGFBR2                               | 1 |
| Embryonic Development                       | proliferation of blastocyst                                | 1.30E-02 | SMAD4                                | 1 |
| Organ Development                           | recovery of heart ventricle                                | 1.30E-02 | HMOX1                                | 1 |
| Cardiovascular System Development and       | recovery of heart ventricle                                | 1.30E-02 | HMOX1                                | 1 |
| Cardiovascular Disease                      | reperfusion injury of liver                                | 1.30E-02 | HMOX1                                | 1 |
| Gastrointestinal Disease                    | reperfusion injury of liver                                | 1.30E-02 | HMOX1                                | 1 |
| Organismal Injury and Abnormalities         | reperfusion injury of liver                                | 1.30E-02 | HMOX1                                | 1 |
| Hepatic System Disease                      | reperfusion injury of liver                                | 1.30E-02 | HMOX1                                | 1 |
| Respiratory Disease                         | rhinophyma                                                 | 1.30E-02 | TGFBR2                               | 1 |
| Dermatological Diseases and Conditions      | rhinophyma                                                 | 1.30E-02 | TGFBR2                               | 1 |
| Molecular Transport                         | secretion of taurocholic acid                              | 1.30E-02 | HMOX1                                | 1 |
| Small Molecule Biochemistry                 | secretion of taurocholic acid                              | 1.30E-02 | HMOX1                                | 1 |
| Lipid Metabolism                            | secretion of taurocholic acid                              | 1.30E-02 | HMOX1                                | 1 |
| Cellular Assembly and Organization          | stabilization of cytoplasmic aggregates                    | 1.30E-02 | AXL                                  | 1 |
| Small Molecule Biochemistry                 | storage of fatty acid                                      | 1.30E-02 | LIPE                                 | 1 |
| Lipid Metabolism                            | storage of fatty acid                                      | 1.30E-02 | LIPE                                 | 1 |
| Nucleic Acid Metabolism                     | synthesis of dTTP                                          | 1.30E-02 | DTYMK                                | 1 |
| Small Molecule Biochemistry                 | synthesis of dTTP                                          | 1.30E-02 | DTYMK                                | 1 |
| Post-Translational Modification             | threonine phosphorylation of protein                       | 1.30E-02 | MAP4K4                               | 1 |
| Cell Signaling                              | threonine phosphorylation of protein                       | 1.30E-02 | MAP4K4                               | 1 |
| Cancer                                      | vascularization of malignant tumor                         | 1.30E-02 | TGFBR2                               | 1 |

|                                        |                                                   |          |                                                                        |    |
|----------------------------------------|---------------------------------------------------|----------|------------------------------------------------------------------------|----|
| Cardiovascular System Development an   | vascularization of malignant tumor                | 1.30E-02 | TGFBR2                                                                 | 1  |
| Tumor Morphology                       | vascularization of malignant tumor                | 1.30E-02 | TGFBR2                                                                 | 1  |
| Cancer                                 | vascularization of papilloma                      | 1.30E-02 | TGFBR2                                                                 | 1  |
| Dermatological Diseases and Conditions | vascularization of papilloma                      | 1.30E-02 | TGFBR2                                                                 | 1  |
| Cardiovascular System Development an   | vascularization of papilloma                      | 1.30E-02 | TGFBR2                                                                 | 1  |
| Tumor Morphology                       | vascularization of papilloma                      | 1.30E-02 | TGFBR2                                                                 | 1  |
| Cancer                                 | thyroid cancer                                    | 1.30E-02 | AXL,DAP3,RPS6KB1,TGFBR2                                                | 4  |
| Endocrine System Disorders             | thyroid cancer                                    | 1.30E-02 | AXL,DAP3,RPS6KB1,TGFBR2                                                | 4  |
| Gene Expression                        | synthesis of RNA                                  | 1.31E-02 | DDX39A,GTF2E1                                                          | 2  |
| Molecular Transport                    | secretion of steroid                              | 1.31E-02 | HMOX1,PHB,PLD2                                                         | 3  |
| Small Molecule Biochemistry            | secretion of steroid                              | 1.31E-02 | HMOX1,PHB,PLD2                                                         | 3  |
| Lipid Metabolism                       | secretion of steroid                              | 1.31E-02 | HMOX1,PHB,PLD2                                                         | 3  |
| Cancer                                 | gastroesophageal cancer                           | 1.38E-02 | ALDH2,IARS2,PHB,PUS7,SMAD4,TGFBR2                                      | 6  |
| Gastrointestinal Disease               | gastroesophageal cancer                           | 1.38E-02 | ALDH2,IARS2,PHB,PUS7,SMAD4,TGFBR2                                      | 6  |
| Cellular Function and Maintenance      | autophagy                                         | 1.39E-02 | BAIAP2,PLD2,RPS6KB1,SH3GLB1,SMAD4                                      | 5  |
| Cell Morphology                        | autophagy                                         | 1.39E-02 | BAIAP2,PLD2,RPS6KB1,SH3GLB1,SMAD4                                      | 5  |
| Tissue Development                     | development of cardiovascular tissue              | 1.41E-02 | AXL,HMOX1,MYOF,PLEC,SMAD4,TGFBR2                                       | 6  |
| Cardiovascular System Development an   | development of cardiovascular tissue              | 1.41E-02 | AXL,HMOX1,MYOF,PLEC,SMAD4,TGFBR2                                       | 6  |
| Protein Synthesis                      | polymerization of protein                         | 1.50E-02 | HMOX1,IMPDH2,PRKAR2A,SH3GLB1,TGM2                                      | 5  |
| Cellular Movement                      | cell movement of ovarian cancer cell lines        | 1.50E-02 | MAP4K4,SMAD4                                                           | 2  |
| Cellular Growth and Proliferation      | arrest in growth of tumor cell lines              | 1.51E-02 | HMOX1,SMAD4,TGFBR2                                                     | 3  |
| Cellular Development                   | arrest in growth of tumor cell lines              | 1.51E-02 | HMOX1,SMAD4,TGFBR2                                                     | 3  |
| Cellular Growth and Proliferation      | arrest in growth of cells                         | 1.55E-02 | HMOX1,RPS6KB1,SMAD4,TGFBR2                                             | 4  |
| Cellular Compromise                    | dysfunction of mitochondria                       | 1.57E-02 | OGDH,SDHA                                                              | 2  |
| Cellular Function and Maintenance      | transmembrane potential of mitochondria           | 1.57E-02 | BCAP31,HMOX1,PHB,TGM2                                                  | 4  |
| Cell Morphology                        | transmembrane potential of mitochondria           | 1.57E-02 | BCAP31,HMOX1,PHB,TGM2                                                  | 4  |
| Protein Synthesis                      | oligomerization of protein                        | 1.62E-02 | HMOX1,PRKAR2A,SH3GLB1,TGM2                                             | 4  |
| Cancer                                 | hematological neoplasia                           | 1.62E-02 | AXL,BCAT1,DKC1,GSR,HMOX1,IMPDH2,MAP4K4,PLD2,RPS6KB1,SMAD4,SH3GLB1,TGM2 | 13 |
| Hematological Disease                  | hematological neoplasia                           | 1.62E-02 | AXL,BCAT1,DKC1,GSR,HMOX1,IMPDH2,MAP4K4,PLD2,RPS6KB1,SMAD4,SH3GLB1,TGM2 | 13 |
| Small Molecule Biochemistry            | metabolism of diacylglycerol                      | 1.64E-02 | LIPE,PLD2                                                              | 2  |
| Lipid Metabolism                       | metabolism of diacylglycerol                      | 1.64E-02 | LIPE,PLD2                                                              | 2  |
| Neurological Disease                   | damage of brain                                   | 1.65E-02 | HMOX1,PHB,TGM2                                                         | 3  |
| Organismal Injury and Abnormalities    | damage of brain                                   | 1.65E-02 | HMOX1,PHB,TGM2                                                         | 3  |
| Gastrointestinal Disease               | injury of liver                                   | 1.65E-02 | HMOX1,SMAD4,TGFBR2                                                     | 3  |
| Organismal Injury and Abnormalities    | injury of liver                                   | 1.65E-02 | HMOX1,SMAD4,TGFBR2                                                     | 3  |
| Hepatic System Disease                 | injury of liver                                   | 1.65E-02 | HMOX1,SMAD4,TGFBR2                                                     | 3  |
| Cellular Movement                      | migration of endothelial cells                    | 1.70E-02 | ARHGEF6,AXL,PLD2,TGFBR2,WARS                                           | 5  |
| Cardiovascular System Development an   | migration of endothelial cells                    | 1.70E-02 | ARHGEF6,AXL,PLD2,TGFBR2,WARS                                           | 5  |
| Cardiovascular Disease                 | aortic coarctation                                | 1.73E-02 | SMAD4                                                                  | 1  |
| Cardiovascular Disease                 | aortitis                                          | 1.73E-02 | HMOX1                                                                  | 1  |
| Inflammatory Disease                   | aortitis                                          | 1.73E-02 | HMOX1                                                                  | 1  |
| Cell Death and Survival                | apoptosis of lens fiber cells                     | 1.73E-02 | TGFBR2                                                                 | 1  |
| Cellular Movement                      | chemotaxis of cervical cancer cell lines          | 1.73E-02 | PLD2                                                                   | 1  |
| Cellular Movement                      | chemotaxis of ovarian cancer cell lines           | 1.73E-02 | SMAD4                                                                  | 1  |
| Cancer                                 | chemotherapy resistance of lung cancer cell lines | 1.73E-02 | AXL                                                                    | 1  |
| Respiratory Disease                    | chemotherapy resistance of lung cancer cell lines | 1.73E-02 | AXL                                                                    | 1  |
| Cellular Response to Therapeutics      | chemotherapy resistance of lung cancer cell lines | 1.73E-02 | AXL                                                                    | 1  |
| Molecular Transport                    | concentration of retinaldehyde                    | 1.73E-02 | LIPE                                                                   | 1  |
| Small Molecule Biochemistry            | concentration of retinaldehyde                    | 1.73E-02 | LIPE                                                                   | 1  |
| Lipid Metabolism                       | concentration of retinaldehyde                    | 1.73E-02 | LIPE                                                                   | 1  |
| Vitamin and Mineral Metabolism         | concentration of retinaldehyde                    | 1.73E-02 | LIPE                                                                   | 1  |
| Ophthalmic Disease                     | congenital nystagmus                              | 1.73E-02 | SMAD4                                                                  | 1  |
| Developmental Disorder                 | congenital nystagmus                              | 1.73E-02 | SMAD4                                                                  | 1  |
| Hereditary Disorder                    | congenital nystagmus                              | 1.73E-02 | SMAD4                                                                  | 1  |
| Cellular Growth and Proliferation      | cytostasis of hepatocytes                         | 1.73E-02 | TGFBR2                                                                 | 1  |
| Hepatic System Development and Funct   | cytostasis of hepatocytes                         | 1.73E-02 | TGFBR2                                                                 | 1  |
| Cellular Growth and Proliferation      | cytostasis of keratinocytes                       | 1.73E-02 | TGFBR2                                                                 | 1  |
| Hair and Skin Development and Functio  | cytostasis of keratinocytes                       | 1.73E-02 | TGFBR2                                                                 | 1  |
| Cellular Growth and Proliferation      | cytostasis of skin cell lines                     | 1.73E-02 | SMAD4                                                                  | 1  |
| Hair and Skin Development and Functio  | cytostasis of skin cell lines                     | 1.73E-02 | SMAD4                                                                  | 1  |
| Cell-To-Cell Signaling and Interaction | cytotoxic reaction of macrophages                 | 1.73E-02 | HMOX1                                                                  | 1  |
| Inflammatory Response                  | cytotoxic reaction of macrophages                 | 1.73E-02 | HMOX1                                                                  | 1  |
| Cellular Assembly and Organization     | dispersal of Golgi apparatus                      | 1.73E-02 | GOLPH3                                                                 | 1  |
| Organ Development                      | expansion of cumulus oocyte complex               | 1.73E-02 | SMAD4                                                                  | 1  |
| Reproductive System Development and    | expansion of cumulus oocyte complex               | 1.73E-02 | SMAD4                                                                  | 1  |
| Organ Morphology                       | expansion of cumulus oocyte complex               | 1.73E-02 | SMAD4                                                                  | 1  |
| Endocrine System Disorders             | familial hyperinsulinemic hypoglycemia            | 1.73E-02 | HADH                                                                   | 1  |
| Hereditary Disorder                    | familial hyperinsulinemic hypoglycemia            | 1.73E-02 | HADH                                                                   | 1  |
| Metabolic Disease                      | familial hyperinsulinemic hypoglycemia            | 1.73E-02 | HADH                                                                   | 1  |
| Cardiovascular Disease                 | fibrosis of atherosclerotic lesion                | 1.73E-02 | TGFBR2                                                                 | 1  |
| Organismal Injury and Abnormalities    | fibrosis of atherosclerotic lesion                | 1.73E-02 | TGFBR2                                                                 | 1  |
| Embryonic Development                  | formation of atrioventricular canal cushion       | 1.73E-02 | SMAD4                                                                  | 1  |
| Organismal Development                 | formation of atrioventricular canal cushion       | 1.73E-02 | SMAD4                                                                  | 1  |
| Tissue Development                     | formation of atrioventricular canal cushion       | 1.73E-02 | SMAD4                                                                  | 1  |
| Embryonic Development                  | formation of dorsal mesoderm                      | 1.73E-02 | SMAD4                                                                  | 1  |
| Organismal Development                 | formation of dorsal mesoderm                      | 1.73E-02 | SMAD4                                                                  | 1  |
| Tissue Development                     | formation of dorsal mesoderm                      | 1.73E-02 | SMAD4                                                                  | 1  |
| Cellular Assembly and Organization     | formation of gamma H2AX nuclear focus             | 1.73E-02 | HMOX1                                                                  | 1  |
| DNA Replication, Recombination, and R  | formation of gamma H2AX nuclear focus             | 1.73E-02 | HMOX1                                                                  | 1  |
| Cell-mediated Immune Response          | frequency of TREG cells                           | 1.73E-02 | TGFBR2                                                                 | 1  |
| Cancer                                 | hereditary paraganglioma-pheochromocytoma syndr   | 1.73E-02 | SDHAF2                                                                 | 1  |
| Hereditary Disorder                    | hereditary paraganglioma-pheochromocytoma syndr   | 1.73E-02 | SDHAF2                                                                 | 1  |
| Cancer                                 | hyperplasia of mammary alveolus                   | 1.73E-02 | SMAD4                                                                  | 1  |
| Organismal Injury and Abnormalities    | hyperplasia of mammary alveolus                   | 1.73E-02 | SMAD4                                                                  | 1  |
| Reproductive System Disease            | hyperplasia of mammary alveolus                   | 1.73E-02 | SMAD4                                                                  | 1  |
| Cellular Function and Maintenance      | initiation of autophagy of cells                  | 1.73E-02 | SH3GLB1                                                                | 1  |
| Cell Morphology                        | initiation of autophagy of cells                  | 1.73E-02 | SH3GLB1                                                                | 1  |
| Cell Death and Survival                | loss of endothelial cells                         | 1.73E-02 | TGFBR2                                                                 | 1  |
| Cellular Movement                      | migration of eye cells                            | 1.73E-02 | TGFBR2                                                                 | 1  |
| Embryonic Development                  | morphogenesis of trachea                          | 1.73E-02 | TGFBR2                                                                 | 1  |
| Organismal Development                 | morphogenesis of trachea                          | 1.73E-02 | TGFBR2                                                                 | 1  |
| Tissue Development                     | morphogenesis of trachea                          | 1.73E-02 | TGFBR2                                                                 | 1  |
| Organ Development                      | morphogenesis of trachea                          | 1.73E-02 | TGFBR2                                                                 | 1  |
| Organ Morphology                       | morphogenesis of trachea                          | 1.73E-02 | TGFBR2                                                                 | 1  |
| Respiratory System Development and Fu  | morphogenesis of trachea                          | 1.73E-02 | TGFBR2                                                                 | 1  |
| Cell Morphology                        | morphology of skin cell lines                     | 1.73E-02 | SMAD4                                                                  | 1  |
| Organismal Injury and Abnormalities    | nephrotoxic acute renal failure                   | 1.73E-02 | HMOX1                                                                  | 1  |
| Renal and Urological Disease           | nephrotoxic acute renal failure                   | 1.73E-02 | HMOX1                                                                  | 1  |
| Neurological Disease                   | nonsyndromic X-linked mental retardation          | 1.73E-02 | ARHGEF6                                                                | 1  |
| Developmental Disorder                 | nonsyndromic X-linked mental retardation          | 1.73E-02 | ARHGEF6                                                                | 1  |
| Hereditary Disorder                    | nonsyndromic X-linked mental retardation          | 1.73E-02 | ARHGEF6                                                                | 1  |
| Cancer                                 | progression of papilloma                          | 1.73E-02 | TGFBR2                                                                 | 1  |
| Dermatological Diseases and Conditions | progression of papilloma                          | 1.73E-02 | TGFBR2                                                                 | 1  |
| Tumor Morphology                       | progression of papilloma                          | 1.73E-02 | TGFBR2                                                                 | 1  |
| Cellular Growth and Proliferation      | proliferation of acinar gland cells               | 1.73E-02 | TGFBR2                                                                 | 1  |
| Cellular Development                   | proliferation of acinar gland cells               | 1.73E-02 | TGFBR2                                                                 | 1  |
| Cellular Growth and Proliferation      | proliferation of basal cells                      | 1.73E-02 | TGFBR2                                                                 | 1  |
| Cell-To-Cell Signaling and Interaction | response of adaptive T-regulatory cells           | 1.73E-02 | HMOX1                                                                  | 1  |
| Hematological System Development anc   | response of adaptive T-regulatory cells           | 1.73E-02 | HMOX1                                                                  | 1  |
| Cardiovascular System Stabilization an | stabilization of vasculature                      | 1.73E-02 | TGFBR2                                                                 | 1  |
| Connective Tissue Development and Fu   | strength of vertebrae                             | 1.73E-02 | TGFBR2                                                                 | 1  |
| Skeletal and Muscular System Developm  | strength of vertebrae                             | 1.73E-02 | TGFBR2                                                                 | 1  |
| Nucleic Acid Metabolism                | synthesis of coenzyme A                           | 1.73E-02 | COASY                                                                  | 1  |
| Small Molecule Biochemistry            | synthesis of coenzyme A                           | 1.73E-02 | COASY                                                                  | 1  |
| Cancer                                 | tumorigenesis of neuroendocrine carcinoma         | 1.73E-02 | SMAD4                                                                  | 1  |
| Cellular Growth and Proliferation      | tumorigenesis of neuroendocrine carcinoma         | 1.73E-02 | SMAD4                                                                  | 1  |
| Cellular Development                   | tumorigenesis of neuroendocrine carcinoma         | 1.73E-02 | SMAD4                                                                  | 1  |
| Tumor Morphology                       | tumorigenesis of neuroendocrine carcinoma         | 1.73E-02 | SMAD4                                                                  | 1  |
| Cancer                                 | astrocytoma                                       | 1.79E-02 | FKBP9,GSR,HSPA2,IMPDH2,MAP4K4,SMAD4                                    | 6  |
| Neurological Disease                   | astrocytoma                                       | 1.79E-02 | FKBP9,GSR,HSPA2,IMPDH2,MAP4K4,SMAD4                                    | 6  |
| Cellular Growth and Proliferation      | proliferation of pancreatic cancer cell lines     | 1.79E-02 | EIF3F,RPS6KB1,SMAD4                                                    | 3  |
| Cellular Development                   | proliferation of pancreatic cancer cell lines     | 1.79E-02 | EIF3F,RPS6KB1,SMAD4                                                    | 3  |
| Organismal Injury and Abnormalities    | glomerulosclerosis                                | 1.83E-02 | DKC1,HMOX1,SMAD4                                                       | 3  |
| Renal and Urological Disease           | glomerulosclerosis                                | 1.83E-02 | DKC1,HMOX1,SMAD4                                                       | 3  |

|                                        |                                                       |          |                                                           |    |
|----------------------------------------|-------------------------------------------------------|----------|-----------------------------------------------------------|----|
| Hematological System Development and   | hematocrit                                            | 1.83E-02 | HMOX1,IREB2,TGM2                                          | 3  |
| Cancer                                 | head and neck cancer                                  | 1.83E-02 | AXL,DAP3,GSR,HSPA2,MAP4K4,RPS6KB1,SMAD4,TGFBR2,TGM2       | 9  |
| Organismal Injury and Abnormalities    | atresia                                               | 1.85E-02 | AXL,SMAD4                                                 | 2  |
| Cardiovascular Disease                 | occlusion of artery                                   | 1.90E-02 | HIBCH,HMOX1,IMPDH2,LIPE,MAP4K4,OGDH,SMAD4,TGFBR2          | 8  |
| Cell Death and Survival                | cell viability of neuroblastoma cell lines            | 2.00E-02 | HMOX1,TGM2                                                | 2  |
| Gene Expression                        | initiation of transcription of RNA                    | 2.00E-02 | LIPE,THRAP3                                               | 2  |
| RNA Post-Transcriptional Modification  | modification of rRNA                                  | 2.00E-02 | DKC1,RPS15                                                | 2  |
| Cell-To-Cell Signaling and Interaction | cell-mediated response of T lymphocytes               | 2.07E-02 | AXL,TGFBR2                                                | 2  |
| Hematological System Development and   | cell-mediated response of T lymphocytes               | 2.07E-02 | AXL,TGFBR2                                                | 2  |
| Inflammatory Response                  | cell-mediated response of T lymphocytes               | 2.07E-02 | AXL,TGFBR2                                                | 2  |
| Cancer                                 | lymphohematopoietic cancer                            | 2.11E-02 | AXL,BCAT1,DKC1,GSR,HMOX1,IMPDH2,MAP4K4,PLD2,RPS6KB1,SMAD4 | 13 |
| Cancer                                 | stomach tumor                                         | 2.11E-02 | IARS2,PHB,PUS7,SMAD4,TGFBR2                               | 5  |
| Gastrointestinal Disease               | stomach tumor                                         | 2.11E-02 | IARS2,PHB,PUS7,SMAD4,TGFBR2                               | 5  |
| Hematological System Development and   | mean corpuscular volume                               | 2.15E-02 | HMOX1,IREB2                                               | 2  |
| Neurological Disease                   | ophthalmoplegia                                       | 2.15E-02 | GOLPH3,TGM2                                               | 2  |
| Ophthalmic Disease                     | ophthalmoplegia                                       | 2.15E-02 | GOLPH3,TGM2                                               | 2  |
| Cell-To-Cell Signaling and Interaction | TH1 immune response of naive T lymphocytes            | 2.15E-02 | AXL                                                       | 1  |
| Hematological System Development and   | TH1 immune response of naive T lymphocytes            | 2.15E-02 | AXL                                                       | 1  |
| Inflammatory Response                  | TH1 immune response of naive T lymphocytes            | 2.15E-02 | AXL                                                       | 1  |
| Cell-mediated Immune Response          | TH1 immune response of naive T lymphocytes            | 2.15E-02 | AXL                                                       | 1  |
| Embryonic Development                  | adhesion of embryonic stem cells                      | 2.15E-02 | BCAP31                                                    | 1  |
| Tissue Development                     | adhesion of embryonic stem cells                      | 2.15E-02 | BCAP31                                                    | 1  |
| Cell-To-Cell Signaling and Interaction | adhesion of embryonic stem cells                      | 2.15E-02 | BCAP31                                                    | 1  |
| Gene Expression                        | binding of C/ebp beta binding site                    | 2.15E-02 | SMAD4                                                     | 1  |
| Cellular Compromise                    | collapse of intermediate filaments                    | 2.15E-02 | PLEC                                                      | 1  |
| Post-Translational Modification        | cross-linkage of protein                              | 2.15E-02 | TGM2                                                      | 1  |
| Protein Folding                        | cross-linkage of protein                              | 2.15E-02 | TGM2                                                      | 1  |
| Tissue Morphology                      | density of red blood cells                            | 2.15E-02 | SLC12A4                                                   | 1  |
| Cellular Assembly and Organization     | depolymerization of actin                             | 2.15E-02 | PLEC                                                      | 1  |
| Cellular Compromise                    | depolymerization of actin                             | 2.15E-02 | PLEC                                                      | 1  |
| Connective Tissue Development and Fu   | development of calvaria                               | 2.15E-02 | TGFBR2                                                    | 1  |
| Embryonic Development                  | development of calvaria                               | 2.15E-02 | TGFBR2                                                    | 1  |
| Organismal Development                 | development of calvaria                               | 2.15E-02 | TGFBR2                                                    | 1  |
| Tissue Development                     | development of calvaria                               | 2.15E-02 | TGFBR2                                                    | 1  |
| Organ Development                      | development of calvaria                               | 2.15E-02 | TGFBR2                                                    | 1  |
| Skeletal and Muscular System Developm  | development of calvaria                               | 2.15E-02 | TGFBR2                                                    | 1  |
| Cell Morphology                        | elongation of lens fiber cells                        | 2.15E-02 | TGFBR2                                                    | 1  |
| Cell Cycle                             | entry into S phase of lung cancer cell lines          | 2.15E-02 | HMOX1                                                     | 1  |
| Cellular Development                   | epithelial-mesenchymal transition of liver cell lines | 2.15E-02 | SMAD4                                                     | 1  |
| Embryonic Development                  | formation of trachea                                  | 2.15E-02 | TGFBR2                                                    | 1  |
| Organismal Development                 | formation of trachea                                  | 2.15E-02 | TGFBR2                                                    | 1  |
| Tissue Development                     | formation of trachea                                  | 2.15E-02 | TGFBR2                                                    | 1  |
| Organ Development                      | formation of trachea                                  | 2.15E-02 | TGFBR2                                                    | 1  |
| Respiratory System Development and Fu  | formation of trachea                                  | 2.15E-02 | TGFBR2                                                    | 1  |
| Cellular Function and Maintenance      | function of endothelial progenitor cells              | 2.15E-02 | HMOX1                                                     | 1  |
| Cellular Function and Maintenance      | glycolysis of leukocyte cell lines                    | 2.15E-02 | RPS6KB1                                                   | 1  |
| Carbohydrate Metabolism                | glycolysis of leukocyte cell lines                    | 2.15E-02 | RPS6KB1                                                   | 1  |
| Connective Tissue Development and Fu   | homeostasis of bone                                   | 2.15E-02 | ALDH2                                                     | 1  |
| Skeletal and Muscular System Developm  | homeostasis of bone                                   | 2.15E-02 | ALDH2                                                     | 1  |
| Cancer                                 | hormone refractory prostate cancer                    | 2.15E-02 | HMOX1                                                     | 1  |
| Organismal Injury and Abnormalities    | hormone refractory prostate cancer                    | 2.15E-02 | HMOX1                                                     | 1  |
| Reproductive System Disease            | hormone refractory prostate cancer                    | 2.15E-02 | HMOX1                                                     | 1  |
| Organismal Injury and Abnormalities    | immune complex nephritis                              | 2.15E-02 | TGM2                                                      | 1  |
| Inflammatory Disease                   | immune complex nephritis                              | 2.15E-02 | TGM2                                                      | 1  |
| Inflammatory Response                  | immune complex nephritis                              | 2.15E-02 | TGM2                                                      | 1  |
| Renal and Urological Disease           | immune complex nephritis                              | 2.15E-02 | TGM2                                                      | 1  |
| Molecular Transport                    | influx of cholesterol                                 | 2.15E-02 | LIPE                                                      | 1  |
| Small Molecule Biochemistry            | influx of cholesterol                                 | 2.15E-02 | LIPE                                                      | 1  |
| Lipid Metabolism                       | influx of cholesterol                                 | 2.15E-02 | LIPE                                                      | 1  |
| Neurological Disease                   | loss of dendrites                                     | 2.15E-02 | TGFBR2                                                    | 1  |
| Cellular Development                   | maturation of osteoblasts                             | 2.15E-02 | HMOX1                                                     | 1  |
| Skeletal and Muscular System Developm  | maturation of osteoblasts                             | 2.15E-02 | HMOX1                                                     | 1  |
| Carbohydrate Metabolism                | metabolism of isocitric acid                          | 2.15E-02 | IDH3A                                                     | 1  |
| Cell Cycle                             | mitogenesis of epithelial tissue                      | 2.15E-02 | RPS6KB1                                                   | 1  |
| Dermatological Diseases and Conditions | pemphigus vulgaris                                    | 2.15E-02 | IMPDH2                                                    | 1  |
| Immunological Disease                  | pemphigus vulgaris                                    | 2.15E-02 | IMPDH2                                                    | 1  |
| Cell Signaling                         | progesterone receptor signaling pathway               | 2.15E-02 | PHB                                                       | 1  |
| Embryonic Development                  | proliferation of cranial neural crest cells           | 2.15E-02 | TGFBR2                                                    | 1  |
| Cellular Growth and Proliferation      | proliferation of cranial neural crest cells           | 2.15E-02 | TGFBR2                                                    | 1  |
| Cellular Development                   | proliferation of cranial neural crest cells           | 2.15E-02 | TGFBR2                                                    | 1  |
| Nervous System Development and Func    | proliferation of cranial neural crest cells           | 2.15E-02 | TGFBR2                                                    | 1  |
| Molecular Transport                    | quantity of AMP                                       | 2.15E-02 | AMPD2                                                     | 1  |
| Nucleic Acid Metabolism                | quantity of AMP                                       | 2.15E-02 | AMPD2                                                     | 1  |
| Small Molecule Biochemistry            | quantity of AMP                                       | 2.15E-02 | AMPD2                                                     | 1  |
| Cellular Assembly and Organization     | quantity of hemidesmosomes                            | 2.15E-02 | PLEC                                                      | 1  |
| Cardiovascular Disease                 | stabilization of atherosclerotic lesion               | 2.15E-02 | HMOX1                                                     | 1  |
| Nucleic Acid Metabolism                | synthesis of NADPH                                    | 2.15E-02 | ALDH2                                                     | 1  |
| Small Molecule Biochemistry            | synthesis of NADPH                                    | 2.15E-02 | ALDH2                                                     | 1  |
| Small Molecule Biochemistry            | synthesis of glycerol                                 | 2.15E-02 | LIPE                                                      | 1  |
| Carbohydrate Metabolism                | synthesis of glycerol                                 | 2.15E-02 | LIPE                                                      | 1  |
| Cancer                                 | transformation of keratinocytes                       | 2.15E-02 | TGFBR2                                                    | 1  |
| Cancer                                 | tumorigenesis of pancreatic tumor                     | 2.15E-02 | SMAD4                                                     | 1  |
| Endocrine System Disorders             | tumorigenesis of pancreatic tumor                     | 2.15E-02 | SMAD4                                                     | 1  |
| Gastrointestinal Disease               | tumorigenesis of pancreatic tumor                     | 2.15E-02 | SMAD4                                                     | 1  |
| Cellular Growth and Proliferation      | tumorigenesis of pancreatic tumor                     | 2.15E-02 | SMAD4                                                     | 1  |
| Cellular Development                   | tumorigenesis of pancreatic tumor                     | 2.15E-02 | SMAD4                                                     | 1  |
| Tumor Morphology                       | tumorigenesis of pancreatic tumor                     | 2.15E-02 | SMAD4                                                     | 1  |
| Cellular Function and Maintenance      | autophagy of cells                                    | 2.17E-02 | BAIAP2,PLD2,RPS6KB1,SH3GLB1                               | 4  |
| Cell Morphology                        | autophagy of cells                                    | 2.17E-02 | BAIAP2,PLD2,RPS6KB1,SH3GLB1                               | 4  |
| Cancer                                 | hematologic cancer                                    | 2.17E-02 | AXL,BCAT1,GSR,HMOX1,IMPDH2,PLD2,SMAD4,STAG2,STRN,TGFBR2   | 10 |
| Hematological Disease                  | hematologic cancer                                    | 2.17E-02 | AXL,BCAT1,GSR,HMOX1,IMPDH2,PLD2,SMAD4,STAG2,STRN,TGFBR2   | 10 |
| Cancer                                 | pancreatic tumor                                      | 2.29E-02 | AXL,EIF3F,MANF,RPS6KB1,SMAD4                              | 5  |
| Endocrine System Disorders             | pancreatic tumor                                      | 2.29E-02 | AXL,EIF3F,MANF,RPS6KB1,SMAD4                              | 5  |
| Gastrointestinal Disease               | pancreatic tumor                                      | 2.29E-02 | AXL,EIF3F,MANF,RPS6KB1,SMAD4                              | 5  |
| Cancer                                 | hyperplasia                                           | 2.29E-02 | AXL,DDX39A,DKC1,HMOX1,PHB,SMAD4,TGFBR2                    | 7  |
| Neurological Disease                   | mitochondrial cytopathy                               | 2.31E-02 | GOLPH3,SDHA                                               | 2  |
| Metabolic Disease                      | mitochondrial cytopathy                               | 2.31E-02 | GOLPH3,SDHA                                               | 2  |
| Skeletal and Muscular Disorders        | mitochondrial cytopathy                               | 2.31E-02 | GOLPH3,SDHA                                               | 2  |
| Cellular Function and Maintenance      | engulfment of tumor cell lines                        | 2.31E-02 | AXL,PLD2,TGM2                                             | 3  |
| Tissue Morphology                      | quantity of red blood cells                           | 2.35E-02 | DKC1,HMOX1,IREB2,TGM2                                     | 4  |
| Hematological System Development and   | quantity of red blood cells                           | 2.35E-02 | DKC1,HMOX1,IREB2,TGM2                                     | 4  |
| Hematopoiesis                          | quantity of red blood cells                           | 2.35E-02 | DKC1,HMOX1,IREB2,TGM2                                     | 4  |
| Cancer                                 | malignant ovarian neoplasm                            | 2.35E-02 | FLII,H2AFY,SMAD4,TGFBR2,TGM2,USP7                         | 6  |
| Endocrine System Disorders             | malignant ovarian neoplasm                            | 2.35E-02 | FLII,H2AFY,SMAD4,TGFBR2,TGM2,USP7                         | 6  |
| Organismal Injury and Abnormalities    | malignant ovarian neoplasm                            | 2.35E-02 | FLII,H2AFY,SMAD4,TGFBR2,TGM2,USP7                         | 6  |
| Reproductive System Disease            | malignant ovarian neoplasm                            | 2.35E-02 | FLII,H2AFY,SMAD4,TGFBR2,TGM2,USP7                         | 6  |
| Tissue Development                     | attachment of cells                                   | 2.35E-02 | BCAP31,IPO9,TGM2                                          | 3  |
| Cell-To-Cell Signaling and Interaction | attachment of cells                                   | 2.35E-02 | BCAP31,IPO9,TGM2                                          | 3  |
| Nucleic Acid Metabolism                | synthesis of cyclic GMP                               | 2.39E-02 | ALDH2,HMOX1                                               | 2  |
| Small Molecule Biochemistry            | synthesis of cyclic GMP                               | 2.39E-02 | ALDH2,HMOX1                                               | 2  |
| Cellular Movement                      | chemotaxis of tumor cell lines                        | 2.40E-02 | AXL,PLD2,SMAD4                                            | 3  |
| Gastrointestinal Disease               | damage of gastrointestinal tract                      | 2.47E-02 | HMOX1,PHB                                                 | 2  |
| Cellular Growth and Proliferation      | proliferation of melanoma cell lines                  | 2.49E-02 | EIF3F,GOLPH3,HMOX1                                        | 3  |
| Cellular Development                   | proliferation of melanoma cell lines                  | 2.49E-02 | EIF3F,GOLPH3,HMOX1                                        | 3  |
| Organismal Survival                    | mortality                                             | 2.53E-02 | HMOX1,TGFBR2,TGM2                                         | 3  |
| Cell Death and Survival                | cell death of germ cells                              | 2.58E-02 | AXL,ELAVL1,HSPA2                                          | 3  |
| Reproductive System Development and    | abnormal morphology of chorionic plate                | 2.58E-02 | ELAVL1                                                    | 1  |
| Organ Morphology                       | abnormal morphology of chorionic plate                | 2.58E-02 | ELAVL1                                                    | 1  |
| Cell Death and Survival                | apoptosis of prostate cells                           | 2.58E-02 | TGFBR2                                                    | 1  |
| Connective Tissue Development and Fu   | attachment of fibroblast cell lines                   | 2.58E-02 | IPO9                                                      | 1  |
| Tissue Development                     | attachment of fibroblast cell lines                   | 2.58E-02 | IPO9                                                      | 1  |
| Cell-To-Cell Signaling and Interaction | attachment of fibroblast cell lines                   | 2.58E-02 | IPO9                                                      | 1  |
| Cell Death and Survival                | cell death of chronic myelogenous leukemia cells      | 2.58E-02 | HMOX1                                                     | 1  |
| Tumor Morphology                       | cell death of chronic myelogenous leukemia cells      | 2.58E-02 | HMOX1                                                     | 1  |

|                                                                                  |                                                    |          |                                                             |    |
|----------------------------------------------------------------------------------|----------------------------------------------------|----------|-------------------------------------------------------------|----|
| Cellular Compromise                                                              | dysfunction of cardiomyocytes                      | 2.58E-02 | ALDH2                                                       | 1  |
| Cell Morphology                                                                  | elongation of spermatids                           | 2.58E-02 | ELAVL1                                                      | 1  |
| Embryonic Development                                                            | elongation of spermatids                           | 2.58E-02 | ELAVL1                                                      | 1  |
| Organismal Development                                                           | elongation of spermatids                           | 2.58E-02 | ELAVL1                                                      | 1  |
| Tissue Development                                                               | elongation of spermatids                           | 2.58E-02 | ELAVL1                                                      | 1  |
| Cellular Development                                                             | elongation of spermatids                           | 2.58E-02 | ELAVL1                                                      | 1  |
| Organ Development                                                                | elongation of spermatids                           | 2.58E-02 | ELAVL1                                                      | 1  |
| Reproductive System Development and Cell Cycle                                   | elongation of spermatids                           | 2.58E-02 | ELAVL1                                                      | 1  |
| Gastrointestinal Disease                                                         | entry into S phase of carcinoma cell lines         | 2.58E-02 | HMOX1                                                       | 1  |
| Organismal Injury and Abnormalities                                              | experimentally-induced hepatic fibrosis            | 2.58E-02 | TGFBR2                                                      | 1  |
| Hepatic System Disease                                                           | experimentally-induced hepatic fibrosis            | 2.58E-02 | TGFBR2                                                      | 1  |
| Organismal Injury and Abnormalities                                              | fibrosis of dermis                                 | 2.58E-02 | TGFBR2                                                      | 1  |
| Dermatological Diseases and Conditions                                           | fibrosis of dermis                                 | 2.58E-02 | TGFBR2                                                      | 1  |
| Embryonic Development                                                            | formation of myoblasts                             | 2.58E-02 | MYOF                                                        | 1  |
| Organismal Development                                                           | formation of myoblasts                             | 2.58E-02 | MYOF                                                        | 1  |
| Tissue Development                                                               | formation of myoblasts                             | 2.58E-02 | MYOF                                                        | 1  |
| Cellular Growth and Proliferation                                                | formation of myoblasts                             | 2.58E-02 | MYOF                                                        | 1  |
| Cellular Development                                                             | formation of myoblasts                             | 2.58E-02 | MYOF                                                        | 1  |
| Organ Development                                                                | formation of myoblasts                             | 2.58E-02 | MYOF                                                        | 1  |
| Skeletal and Muscular System Development                                         | formation of myoblasts                             | 2.58E-02 | MYOF                                                        | 1  |
| Embryonic Development                                                            | formation of myofibroblasts                        | 2.58E-02 | TGFBR2                                                      | 1  |
| Organismal Development                                                           | formation of myofibroblasts                        | 2.58E-02 | TGFBR2                                                      | 1  |
| Tissue Development                                                               | formation of myofibroblasts                        | 2.58E-02 | TGFBR2                                                      | 1  |
| Cellular Growth and Proliferation                                                | formation of myofibroblasts                        | 2.58E-02 | TGFBR2                                                      | 1  |
| Cellular Development                                                             | formation of myofibroblasts                        | 2.58E-02 | TGFBR2                                                      | 1  |
| Organ Development                                                                | formation of myofibroblasts                        | 2.58E-02 | TGFBR2                                                      | 1  |
| Skeletal and Muscular System Development                                         | formation of myofibroblasts                        | 2.58E-02 | TGFBR2                                                      | 1  |
| Cardiovascular System Development and Connective Tissue Development and Function | formation of vascular plexus                       | 2.58E-02 | TGFBR2                                                      | 1  |
| Tissue Development                                                               | function of brown adipose tissue                   | 2.58E-02 | LIPE                                                        | 1  |
| Infectious Disease                                                               | infection of fibrosarcoma cell lines               | 2.58E-02 | AXL                                                         | 1  |
| Cardiovascular Disease                                                           | inflammation of atherosclerotic lesion             | 2.58E-02 | TGFBR2                                                      | 1  |
| Inflammatory Response                                                            | inflammation of atherosclerotic lesion             | 2.58E-02 | TGFBR2                                                      | 1  |
| Nucleic Acid Metabolism                                                          | metabolism of succinyl-coenzyme A                  | 2.58E-02 | OGDH                                                        | 1  |
| Small Molecule Biochemistry                                                      | metabolism of succinyl-coenzyme A                  | 2.58E-02 | OGDH                                                        | 1  |
| Lipid Metabolism                                                                 | metabolism of succinyl-coenzyme A                  | 2.58E-02 | OGDH                                                        | 1  |
| Embryonic Development                                                            | morphogenesis of lung lobe                         | 2.58E-02 | TGFBR2                                                      | 1  |
| Organismal Development                                                           | morphogenesis of lung lobe                         | 2.58E-02 | TGFBR2                                                      | 1  |
| Tissue Development                                                               | morphogenesis of lung lobe                         | 2.58E-02 | TGFBR2                                                      | 1  |
| Organ Development                                                                | morphogenesis of lung lobe                         | 2.58E-02 | TGFBR2                                                      | 1  |
| Respiratory System Development and Function                                      | morphogenesis of lung lobe                         | 2.58E-02 | TGFBR2                                                      | 1  |
| Cellular Function and Maintenance                                                | phagocytosis by Sertoli cells                      | 2.58E-02 | AXL                                                         | 1  |
| Cell-To-Cell Signaling and Interaction                                           | phagocytosis by Sertoli cells                      | 2.58E-02 | AXL                                                         | 1  |
| Inflammatory Response                                                            | phagocytosis by Sertoli cells                      | 2.58E-02 | AXL                                                         | 1  |
| Molecular Transport                                                              | quantity of heme                                   | 2.58E-02 | HMOX1                                                       | 1  |
| Small Molecule Biochemistry                                                      | quantity of heme                                   | 2.58E-02 | HMOX1                                                       | 1  |
| Molecular Transport                                                              | quantity of melanin                                | 2.58E-02 | PLD2                                                        | 1  |
| Small Molecule Biochemistry                                                      | quantity of melanin                                | 2.58E-02 | PLD2                                                        | 1  |
| Cellular Assembly and Organization                                               | rearrangement of actin stress fibers               | 2.58E-02 | PLEC                                                        | 1  |
| Cellular Movement                                                                | recruitment of mast precursor cells                | 2.58E-02 | TGFBR2                                                      | 1  |
| Cell-To-Cell Signaling and Interaction                                           | recruitment of mast precursor cells                | 2.58E-02 | TGFBR2                                                      | 1  |
| Hematological System Development and Function                                    | recruitment of mast precursor cells                | 2.58E-02 | TGFBR2                                                      | 1  |
| Inflammatory Response                                                            | recruitment of mast precursor cells                | 2.58E-02 | TGFBR2                                                      | 1  |
| Hypersensitivity Response                                                        | recruitment of mast precursor cells                | 2.58E-02 | TGFBR2                                                      | 1  |
| Immune Cell Trafficking                                                          | recruitment of mast precursor cells                | 2.58E-02 | TGFBR2                                                      | 1  |
| Connective Tissue Development and Function                                       | strength of femur                                  | 2.58E-02 | TGFBR2                                                      | 1  |
| Skeletal and Muscular System Development                                         | strength of femur                                  | 2.58E-02 | TGFBR2                                                      | 1  |
| Embryonic Development                                                            | spermatogenesis                                    | 2.59E-02 | AXL,ELAVL1,GSR,HSPA2,LIPE                                   | 5  |
| Organismal Development                                                           | spermatogenesis                                    | 2.59E-02 | AXL,ELAVL1,GSR,HSPA2,LIPE                                   | 5  |
| Tissue Development                                                               | spermatogenesis                                    | 2.59E-02 | AXL,ELAVL1,GSR,HSPA2,LIPE                                   | 5  |
| Cellular Development                                                             | spermatogenesis                                    | 2.59E-02 | AXL,ELAVL1,GSR,HSPA2,LIPE                                   | 5  |
| Organ Development                                                                | spermatogenesis                                    | 2.59E-02 | AXL,ELAVL1,GSR,HSPA2,LIPE                                   | 5  |
| Reproductive System Development and Function                                     | spermatogenesis                                    | 2.59E-02 | AXL,ELAVL1,GSR,HSPA2,LIPE                                   | 5  |
| Cardiovascular System Development and Function                                   | morphology of cardiovascular system                | 2.64E-02 | AXL,DKC1,ELAVL1,HMOX1,IREB2,RPS6KB1,TGFBR2,TGM2             | 8  |
| Cancer                                                                           | breast or ovarian cancer                           | 2.68E-02 | AXL,BCAT1,CAPZA2,DKC1,FLII,H2AFY,HMOX1,IDH3A,PHB,PLEC,SMAD4 | 15 |
| Organismal Development                                                           | development of multicellular organism              | 2.71E-02 | ELAVL1,FLII,NELFA                                           | 3  |
| Organismal Injury and Abnormalities                                              | aciduria                                           | 2.72E-02 | HADH,OGDH                                                   | 2  |
| Metabolic Disease                                                                | aciduria                                           | 2.72E-02 | HADH,OGDH                                                   | 2  |
| Renal and Urological Disease                                                     | aciduria                                           | 2.72E-02 | HADH,OGDH                                                   | 2  |
| Cellular Growth and Proliferation                                                | proliferation of muscle cell lines                 | 2.72E-02 | RPS6KB1,TGM2                                                | 2  |
| Cellular Development                                                             | proliferation of muscle cell lines                 | 2.72E-02 | RPS6KB1,TGM2                                                | 2  |
| Skeletal and Muscular System Development                                         | proliferation of muscle cell lines                 | 2.72E-02 | RPS6KB1,TGM2                                                | 2  |
| Cancer                                                                           | progression of tumor                               | 2.90E-02 | AXL,SMAD4,TGFBR2                                            | 3  |
| Tumor Morphology                                                                 | progression of tumor                               | 2.90E-02 | AXL,SMAD4,TGFBR2                                            | 3  |
| Cancer                                                                           | myeloid leukemia                                   | 2.93E-02 | AXL,IMPDPH2,SMAD4,STAG2                                     | 4  |
| Hematological Disease                                                            | myeloid leukemia                                   | 2.93E-02 | AXL,IMPDPH2,SMAD4,STAG2                                     | 4  |
| Organismal Development                                                           | abnormal morphology of nephron                     | 2.95E-02 | AMPD2,DKC1,HMOX1                                            | 3  |
| Organ Morphology                                                                 | abnormal morphology of nephron                     | 2.95E-02 | AMPD2,DKC1,HMOX1                                            | 3  |
| Renal and Urological System Development                                          | abnormal morphology of nephron                     | 2.95E-02 | AMPD2,DKC1,HMOX1                                            | 3  |
| Cellular Movement                                                                | infiltration of macrophages                        | 2.95E-02 | HMOX1,SMAD4,TGFBR2                                          | 3  |
| Hematological System Development and Function                                    | infiltration of macrophages                        | 2.95E-02 | HMOX1,SMAD4,TGFBR2                                          | 3  |
| Inflammatory Response                                                            | infiltration of macrophages                        | 2.95E-02 | HMOX1,SMAD4,TGFBR2                                          | 3  |
| Immune Cell Trafficking                                                          | infiltration of macrophages                        | 2.95E-02 | HMOX1,SMAD4,TGFBR2                                          | 3  |
| Molecular Transport                                                              | concentration of lipid                             | 2.96E-02 | GOLPH3,HADH,HMOX1,LIPE,PLD2,RPS6KB1,SMAD4,TGFBR2,TGM2       | 9  |
| Small Molecule Biochemistry                                                      | concentration of lipid                             | 2.96E-02 | GOLPH3,HADH,HMOX1,LIPE,PLD2,RPS6KB1,SMAD4,TGFBR2,TGM2       | 9  |
| Lipid Metabolism                                                                 | concentration of lipid                             | 2.96E-02 | GOLPH3,HADH,HMOX1,LIPE,PLD2,RPS6KB1,SMAD4,TGFBR2,TGM2       | 9  |
| Organismal Injury and Abnormalities                                              | genodermatosis                                     | 2.98E-02 | DKC1,PLEC                                                   | 2  |
| Dermatological Diseases and Conditions                                           | genodermatosis                                     | 2.98E-02 | DKC1,PLEC                                                   | 2  |
| Developmental Disorder                                                           | genodermatosis                                     | 2.98E-02 | DKC1,PLEC                                                   | 2  |
| Cell-To-Cell Signaling and Interaction                                           | T cell response                                    | 3.00E-02 | AXL,HMOX1,TGFBR2                                            | 3  |
| Hematological System Development and Function                                    | T cell response                                    | 3.00E-02 | AXL,HMOX1,TGFBR2                                            | 3  |
| Cardiovascular Disease                                                           | Wegener's granulomatosis                           | 3.00E-02 | IMPDPH2                                                     | 1  |
| Inflammatory Disease                                                             | Wegener's granulomatosis                           | 3.00E-02 | IMPDPH2                                                     | 1  |
| Molecular Transport                                                              | accumulation of diacylglycerol                     | 3.00E-02 | LIPE                                                        | 1  |
| Small Molecule Biochemistry                                                      | accumulation of diacylglycerol                     | 3.00E-02 | LIPE                                                        | 1  |
| Lipid Metabolism                                                                 | accumulation of diacylglycerol                     | 3.00E-02 | LIPE                                                        | 1  |
| Connective Tissue Development and Function                                       | accumulation of fibroblasts                        | 3.00E-02 | HMOX1                                                       | 1  |
| Tissue Development                                                               | accumulation of fibroblasts                        | 3.00E-02 | HMOX1                                                       | 1  |
| Tissue Development                                                               | accumulation of lung cancer cell lines             | 3.00E-02 | HMOX1                                                       | 1  |
| Embryonic Development                                                            | angiogenesis of retina                             | 3.00E-02 | WARS                                                        | 1  |
| Organismal Development                                                           | angiogenesis of retina                             | 3.00E-02 | WARS                                                        | 1  |
| Tissue Development                                                               | angiogenesis of retina                             | 3.00E-02 | WARS                                                        | 1  |
| Organ Development                                                                | angiogenesis of retina                             | 3.00E-02 | WARS                                                        | 1  |
| Cardiovascular System Development and Function                                   | angiogenesis of retina                             | 3.00E-02 | WARS                                                        | 1  |
| Visual System Development and Function                                           | angiogenesis of retina                             | 3.00E-02 | WARS                                                        | 1  |
| Cell Death and Survival                                                          | anoikis of kidney cell lines                       | 3.00E-02 | DAP3                                                        | 1  |
| Cellular Growth and Proliferation                                                | arrest in growth of colon cancer cell lines        | 3.00E-02 | TGFBR2                                                      | 1  |
| Cellular Development                                                             | arrest in growth of colon cancer cell lines        | 3.00E-02 | TGFBR2                                                      | 1  |
| Cellular Growth and Proliferation                                                | arrest in growth of hematopoietic progenitor cells | 3.00E-02 | SMAD4                                                       | 1  |
| Cellular Development                                                             | arrest in growth of hematopoietic progenitor cells | 3.00E-02 | SMAD4                                                       | 1  |
| Hematological System Development and Function                                    | arrest in growth of hematopoietic progenitor cells | 3.00E-02 | SMAD4                                                       | 1  |
| Hematopoiesis                                                                    | arrest in growth of hematopoietic progenitor cells | 3.00E-02 | SMAD4                                                       | 1  |
| Protein Synthesis                                                                | arrest in translation of protein                   | 3.00E-02 | RPS6KB1                                                     | 1  |
| Gene Expression                                                                  | binding of mRNA                                    | 3.00E-02 | RPS6KB1                                                     | 1  |
| RNA Post-Transcriptional Modification                                            | binding of mRNA                                    | 3.00E-02 | RPS6KB1                                                     | 1  |
| Connective Tissue Development and Function                                       | bone mineral content                               | 3.00E-02 | TGFBR2                                                      | 1  |
| Skeletal and Muscular System Development                                         | bone mineral content                               | 3.00E-02 | TGFBR2                                                      | 1  |
| Cell Morphology                                                                  | branching of vasculature                           | 3.00E-02 | TGFBR2                                                      | 1  |
| Cellular Development                                                             | branching of vasculature                           | 3.00E-02 | TGFBR2                                                      | 1  |
| Cardiovascular System Development and Function                                   | branching of vasculature                           | 3.00E-02 | TGFBR2                                                      | 1  |
| Cell Death and Survival                                                          | cell death of adenocarcinoma cell lines            | 3.00E-02 | TGM2                                                        | 1  |
| Cellular Function and Maintenance                                                | differentiation of natural killer T lymphocytes    | 3.00E-02 | TGFBR2                                                      | 1  |
| Cellular Development                                                             | differentiation of natural killer T lymphocytes    | 3.00E-02 | TGFBR2                                                      | 1  |

|                                                                                    |                                                       |          |                                                             |    |
|------------------------------------------------------------------------------------|-------------------------------------------------------|----------|-------------------------------------------------------------|----|
| Hematological System Development and Hematopoiesis                                 | differentiation of natural killer T lymphocytes       | 3.00E-02 | TGFBR2                                                      | 1  |
| Lymphoid Tissue Structure and Development                                          | differentiation of natural killer T lymphocytes       | 3.00E-02 | TGFBR2                                                      | 1  |
| Cell-mediated Immune Response                                                      | differentiation of natural killer T lymphocytes       | 3.00E-02 | TGFBR2                                                      | 1  |
| Cellular Development                                                               | epithelial-mesenchymal transition of lung cancer cell | 3.00E-02 | PHB                                                         | 1  |
| Cellular Assembly and Organization                                                 | formation of actin comet                              | 3.00E-02 | DNMBP                                                       | 1  |
| Cell-To-Cell Signaling and Interaction                                             | formation of actin comet                              | 3.00E-02 | DNMBP                                                       | 1  |
| Organismal Injury and Abnormalities                                                | formation of epidermoid                               | 3.00E-02 | SMAD4                                                       | 1  |
| Cellular Function and Maintenance                                                  | formation of myosin filaments                         | 3.00E-02 | RAP1GDS1                                                    | 1  |
| Cellular Assembly and Organization                                                 | formation of myosin filaments                         | 3.00E-02 | RAP1GDS1                                                    | 1  |
| Tissue Development                                                                 | formation of myosin filaments                         | 3.00E-02 | RAP1GDS1                                                    | 1  |
| Skeletal and Muscular System Development                                           | formation of myosin filaments                         | 3.00E-02 | RAP1GDS1                                                    | 1  |
| Organismal Injury and Abnormalities                                                | hyperkeratosis of epidermis                           | 3.00E-02 | TGFBR2                                                      | 1  |
| Dermatological Diseases and Conditions                                             | hyperkeratosis of epidermis                           | 3.00E-02 | TGFBR2                                                      | 1  |
| Organismal Injury and Abnormalities                                                | hypoplasia of labyrinthine zone of placenta           | 3.00E-02 | ELAVL1                                                      | 1  |
| Reproductive System Disease                                                        | hypoplasia of labyrinthine zone of placenta           | 3.00E-02 | ELAVL1                                                      | 1  |
| Developmental Disorder                                                             | hypoplasia of labyrinthine zone of placenta           | 3.00E-02 | ELAVL1                                                      | 1  |
| Cell Morphology                                                                    | mineralization of vascular smooth muscle cells        | 3.00E-02 | AXL                                                         | 1  |
| Cardiovascular Disease                                                             | mineralization of vascular smooth muscle cells        | 3.00E-02 | AXL                                                         | 1  |
| Embryonic Development                                                              | morphogenesis of nephrogenic mesenchyme               | 3.00E-02 | SMAD4                                                       | 1  |
| Organismal Development                                                             | morphogenesis of nephrogenic mesenchyme               | 3.00E-02 | SMAD4                                                       | 1  |
| Tissue Development                                                                 | morphogenesis of nephrogenic mesenchyme               | 3.00E-02 | SMAD4                                                       | 1  |
| Cancer                                                                             | progression of squamous-cell carcinoma                | 3.00E-02 | TGFBR2                                                      | 1  |
| Tumor Morphology                                                                   | progression of squamous-cell carcinoma                | 3.00E-02 | TGFBR2                                                      | 1  |
| Cellular Growth and Proliferation                                                  | proliferation of prostate cells                       | 3.00E-02 | TGFBR2                                                      | 1  |
| Cellular Development                                                               | proliferation of prostate cells                       | 3.00E-02 | TGFBR2                                                      | 1  |
| Reproductive System Development and Cellular Assembly and Organization             | proliferation of prostate cells                       | 3.00E-02 | TGFBR2                                                      | 1  |
| DNA Replication, Recombination, and Repair                                         | quantity of PML nuclear bodies                        | 3.00E-02 | USP7                                                        | 1  |
| Molecular Transport                                                                | quantity of retinyl ester                             | 3.00E-02 | LIPE                                                        | 1  |
| Small Molecule Biochemistry                                                        | quantity of retinyl ester                             | 3.00E-02 | LIPE                                                        | 1  |
| Lipid Metabolism                                                                   | quantity of retinyl ester                             | 3.00E-02 | LIPE                                                        | 1  |
| Vitamin and Mineral Metabolism                                                     | quantity of retinyl ester                             | 3.00E-02 | LIPE                                                        | 1  |
| Cardiovascular System Development and Organ Morphology                             | relaxation of heart ventricle                         | 3.00E-02 | TGM2                                                        | 1  |
| Cell Cycle                                                                         | senescence of keratinocytes                           | 3.00E-02 | TGFBR2                                                      | 1  |
| Cellular Development                                                               | senescence of keratinocytes                           | 3.00E-02 | TGFBR2                                                      | 1  |
| Hair and Skin Development and Function                                             | senescence of keratinocytes                           | 3.00E-02 | TGFBR2                                                      | 1  |
| Infectious Disease                                                                 | viral entry by Zaire ebolavirus                       | 3.00E-02 | AXL                                                         | 1  |
| Cellular Growth and Proliferation                                                  | proliferation of lung cancer cell lines               | 3.04E-02 | AXL,GOLPH3,H2AFY,HMOX1                                      | 4  |
| Cellular Development                                                               | proliferation of lung cancer cell lines               | 3.04E-02 | AXL,GOLPH3,H2AFY,HMOX1                                      | 4  |
| Cardiovascular Disease                                                             | damage of heart                                       | 3.07E-02 | ALDH2,HMOX1                                                 | 2  |
| Organismal Injury and Abnormalities                                                | damage of heart                                       | 3.07E-02 | ALDH2,HMOX1                                                 | 2  |
| Cell Morphology                                                                    | elongation of cells                                   | 3.07E-02 | ELAVL1,TGFBR2                                               | 2  |
| Cellular Development                                                               | differentiation of muscle cells                       | 3.11E-02 | HMOX1,SMAD4,TGFBR2,TGM2                                     | 4  |
| Skeletal and Muscular System Development                                           | differentiation of muscle cells                       | 3.11E-02 | HMOX1,SMAD4,TGFBR2,TGM2                                     | 4  |
| Cardiovascular Disease                                                             | atherosclerosis                                       | 3.24E-02 | HMOX1,IMPDH2,LIPE,OGDH,SMAD4,TGFBR2                         | 6  |
| Cellular Growth and Proliferation                                                  | proliferation of tumor cell lines                     | 3.25E-02 | AXL,EIF3F,ELAVL1,GOLPH3,H2AFY,HMOX1,MAP4K4,NFS1,PHB,RPS6KB1 | 14 |
| Cellular Development                                                               | proliferation of tumor cell lines                     | 3.25E-02 | AXL,EIF3F,ELAVL1,GOLPH3,H2AFY,HMOX1,MAP4K4,NFS1,PHB,RPS6KB1 | 14 |
| Tissue Development                                                                 | formation of endothelial tube                         | 3.25E-02 | SMAD4,TGFBR2                                                | 2  |
| Cardiovascular System Development and Endocrine System Disorders                   | formation of endothelial tube                         | 3.25E-02 | SMAD4,TGFBR2                                                | 2  |
| Gastrointestinal Disease                                                           | hyperinsulinism                                       | 3.25E-02 | HADH,LIPE                                                   | 2  |
| Metabolic Disease                                                                  | hyperinsulinism                                       | 3.25E-02 | HADH,LIPE                                                   | 2  |
| Molecular Transport                                                                | abnormal quantity of lipid                            | 3.25E-02 | HADH,LIPE,RPS6KB1                                           | 3  |
| Small Molecule Biochemistry                                                        | abnormal quantity of lipid                            | 3.25E-02 | HADH,LIPE,RPS6KB1                                           | 3  |
| Lipid Metabolism                                                                   | abnormal quantity of lipid                            | 3.25E-02 | HADH,LIPE,RPS6KB1                                           | 3  |
| Cellular Movement                                                                  | cell movement of macrophages                          | 3.26E-02 | HMOX1,PLEC,SMAD4,TGFBR2                                     | 4  |
| Hematological System Development and Inflammatory Response                         | cell movement of macrophages                          | 3.26E-02 | HMOX1,PLEC,SMAD4,TGFBR2                                     | 4  |
| Immune Cell Trafficking                                                            | cell movement of macrophages                          | 3.26E-02 | HMOX1,PLEC,SMAD4,TGFBR2                                     | 4  |
| Cellular Function and Maintenance                                                  | phagocytosis of cells                                 | 3.26E-02 | AXL,HMOX1,PLD2,TGM2                                         | 4  |
| Cell-To-Cell Signaling and Interaction                                             | phagocytosis of cells                                 | 3.26E-02 | AXL,HMOX1,PLD2,TGM2                                         | 4  |
| Inflammatory Response                                                              | phagocytosis of cells                                 | 3.26E-02 | AXL,HMOX1,PLD2,TGM2                                         | 4  |
| Reproductive System Disease                                                        | infection of cervical cancer cell lines               | 3.29E-02 | AXL,FLII,GBAS,GOLPH3,HIBCH,HSPA9                            | 6  |
| Infectious Disease                                                                 | infection of cervical cancer cell lines               | 3.29E-02 | AXL,FLII,GBAS,GOLPH3,HIBCH,HSPA9                            | 6  |
| Cellular Movement                                                                  | cell movement of breast cancer cell lines             | 3.29E-02 | AXL,MAP4K4,SMAD4,TGM2                                       | 4  |
| Protein Synthesis                                                                  | metabolism of protein                                 | 3.32E-02 | DKC1,EIF3F,ELAVL1,IPO9,IREB2,RPS6KB1,TGM2,USP7,WARS         | 9  |
| Cellular Development                                                               | epithelial-mesenchymal transition of tumor cell lines | 3.34E-02 | PHB,TGM2                                                    | 2  |
| Molecular Transport                                                                | nuclear export of molecule                            | 3.34E-02 | DDX39A,HSPA9                                                | 2  |
| Dermatological Diseases and Conditions                                             | psoriasis                                             | 3.41E-02 | DDX39A,GBAS,H2AFY,HMOX1,IDH3A,MANF,PHB                      | 7  |
| Cell Morphology                                                                    | abnormal morphology of alpha islet cells              | 3.42E-02 | HADH                                                        | 1  |
| Organismal Development                                                             | abnormal morphology of alpha islet cells              | 3.42E-02 | HADH                                                        | 1  |
| Digestive System Development and Endocrine System Development and Organ Morphology | abnormal morphology of alpha islet cells              | 3.42E-02 | HADH                                                        | 1  |
| Organismal Development                                                             | abnormal morphology of alpha islet cells              | 3.42E-02 | HADH                                                        | 1  |
| Organismal Development                                                             | abnormal morphology of enlarged uterus                | 3.42E-02 | AXL                                                         | 1  |
| Reproductive System Development and Organ Morphology                               | abnormal morphology of enlarged uterus                | 3.42E-02 | AXL                                                         | 1  |
| Organismal Injury and Abnormalities                                                | bleeding of retina                                    | 3.42E-02 | TGFBR2                                                      | 1  |
| Ophthalmic Disease                                                                 | bleeding of retina                                    | 3.42E-02 | TGFBR2                                                      | 1  |

**Supplementary Tab.S9. Prognostic value of RPS6KB1 expression for the biochemical recurrence-free survival in univariate and multivariate analysis by Cox Regression**

|                               | BCR-free survival   |          | Overall survival    |          |
|-------------------------------|---------------------|----------|---------------------|----------|
|                               | HR (95% CI)         | <i>P</i> | HR (95% CI)         | <i>P</i> |
| (a) Univariate analysis       |                     |          |                     |          |
| RPS6KB1                       | 2.149 (1.167-3.959) | 0.014    | 3.123 (1.116-8.741) | 0.03     |
| Preoperative PSA              | 1.727 (0.86-3.469)  | 0.125    | 1.094 (0.456-2.623) | 0.841    |
| AJCC Pathological tumor stage | 2.052 (1.315-3.204) | 0.002    | 1.619 (0.855-3.065) | 0.139    |
| Surgical margin status        | 1.995 (1.303-3.053) | 0.001    | 1.203 (0.656-2.205) | 0.55     |
| Gleason score                 | 2.59 (1.91-3.513)   | <0.001   | 2.037(1.331-3.118)  | 0.001    |
| PSA failure                   | -                   | -        | 2.311(1.266-4.22)   | 0.006    |
| (b) Multivariate analysis     |                     |          |                     |          |
| RPS6KB1                       | 2.041 (1.098-3.792) | 0.024    | 2.992 (1.058-8.462) | 0.039    |
| AJCC Pathological tumor stage | 1.313 (0.819-2.107) | 0.258    | 1.078 (0.537-2.164) | 0.832    |
| Surgical margin status        | 1.27 (0.809-1.994)  | 0.299    | 0.77 (0.405-1.467)  | 0.428    |
| Gleason score                 | 2.426 (1.751-3.361) | <0.001   | 1.896 (1.161-3.097) | 0.011    |
| PSA failure                   | -                   | -        | 1.59 (0.826-3.063)  | 0.165    |

HR, Hazard ratio; CI, confidence interval; RPS6KB1, between positive and negative; Preoperative PSA (ng/ml), between  $\leq 4$  and  $>4$ ; AJCC Pathological tumor stage, between T2A-T2C and T3A-T4; Surgical margin status, between positive and negative; Gleason score, among Gleason score  $\leq 6$ , 7 and  $\geq 8$ ; PSA failure, between yes and no.
